# Supplementary material
Source: PubMed Central journal article supplement (PMC6645229)
Supplement: ao7b01279_si_001.pdf [file ao7b01279_si_001.pdf]

# Supporting Information

## A Green Method to Prepare Oxindole-Fused Spirotetrahydrofuran Scaffolds through Methanesulfonic Acid Catalyzed Cyclization Reactions of 3-Allyl-3-hydroxy-2-oxindole in Water

Jie-Huan Zhang,<sup>†,§</sup> Ru-Bing Wang,<sup>‡,§</sup> De-Feng Li,<sup>†</sup> and Li-Ming Zhao<sup>\*,†</sup>

<sup>†</sup>*School of Chemistry and Materials Science, Jiangsu Normal University, Xuzhou 221116,*

*Jiangsu, China*

<sup>‡</sup>*State Key Laboratory of Bioactive Substance and Function of Natural Medicines, Institute of*

*Materia Medica, Chinese Academy of Medical Sciences and Peking Union Medical College,*

*Beijing 100050, China*

[lmzhao@jsnu.edu.cn](mailto:lmzhao@jsnu.edu.cn)

## Table of Contents

|                                                                                             |        |
|---------------------------------------------------------------------------------------------|--------|
| 1. Copies of <sup>1</sup> H and <sup>13</sup> C NMR Spectra for Compounds <b>2a-w</b> ..... | S2-S24 |
| 2. Copies of <sup>1</sup> H and <sup>13</sup> C NMR Spectra for Compound <b>5</b> .....     | S25    |
| 3. Copies of <sup>1</sup> H and <sup>13</sup> C NMR Spectra for Compound <b>7</b> .....     | S26    |
| 4. Crystal structure of Compound <b>2o</b> .....                                            | S27    |

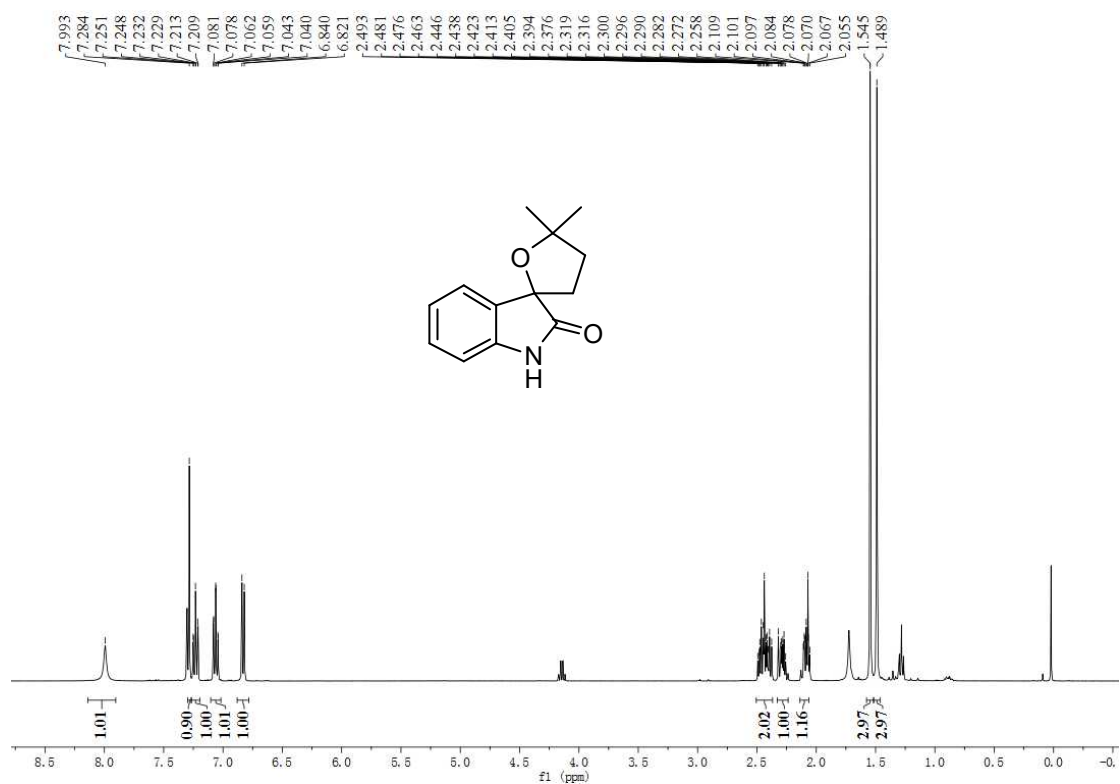

**Figure S1.** <sup>1</sup>H NMR Spectrum (400 MHz, CDCl<sub>3</sub>) of Compound 2a

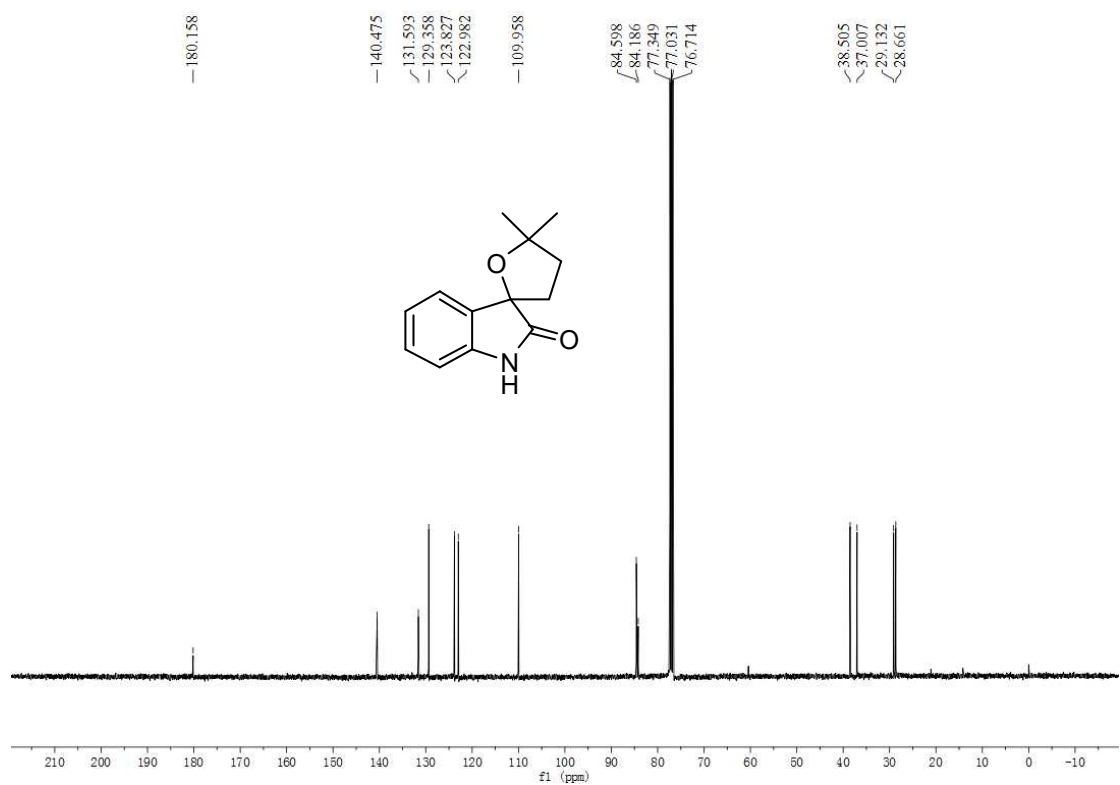

**Figure S2.** <sup>13</sup>C NMR Spectrum (100 MHz, CDCl<sub>3</sub>) of Compound 2a

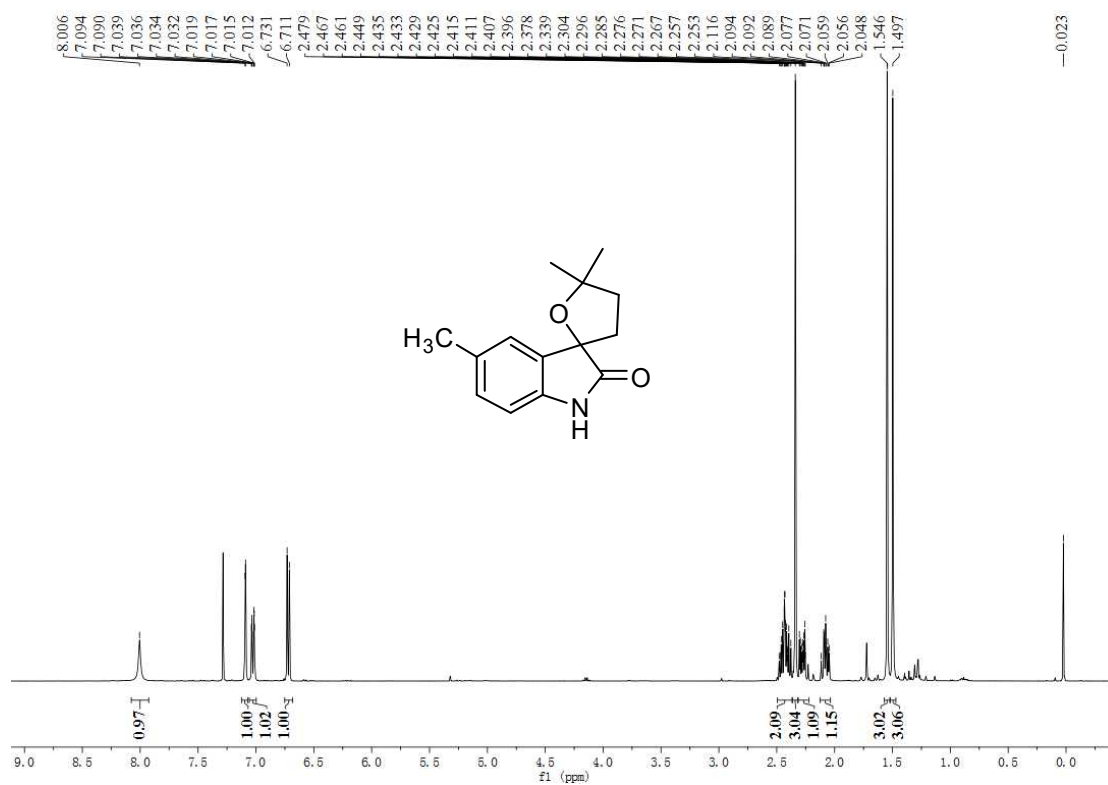

**Figure S3.** <sup>1</sup>H NMR Spectrum (400 MHz, CDCl<sub>3</sub>) of Compound **2b**

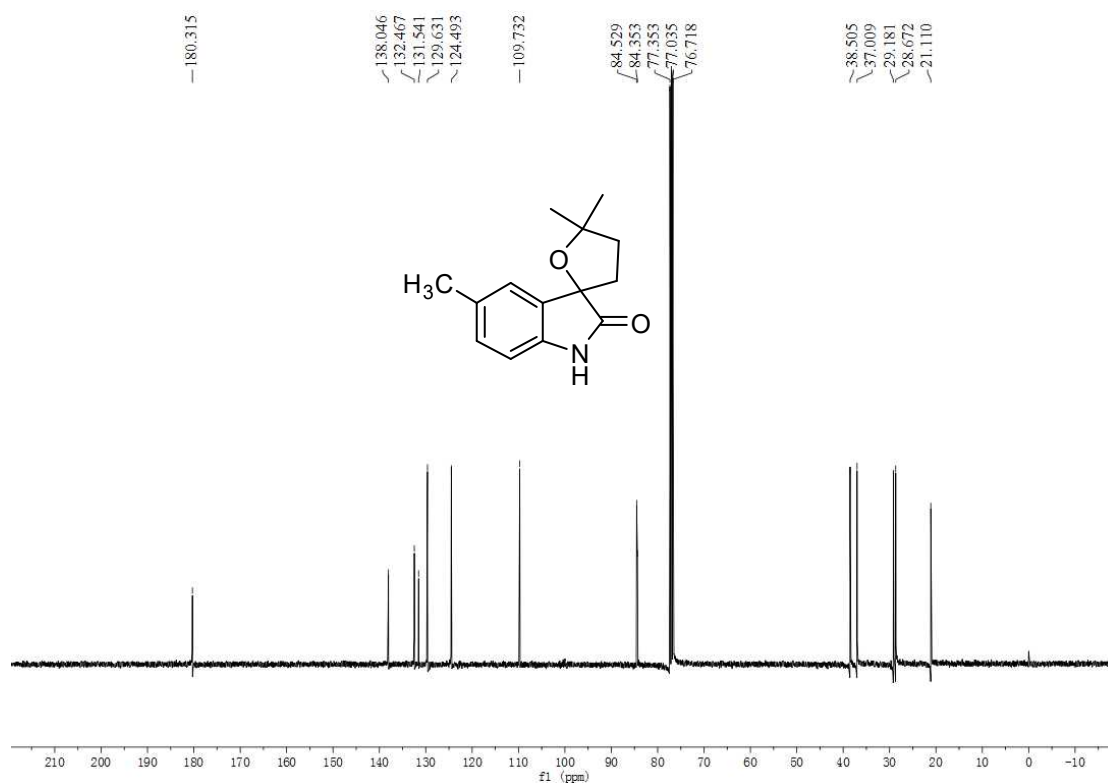

**Figure S4.** <sup>13</sup>C NMR Spectrum (100 MHz, CDCl<sub>3</sub>) of Compound **2b**

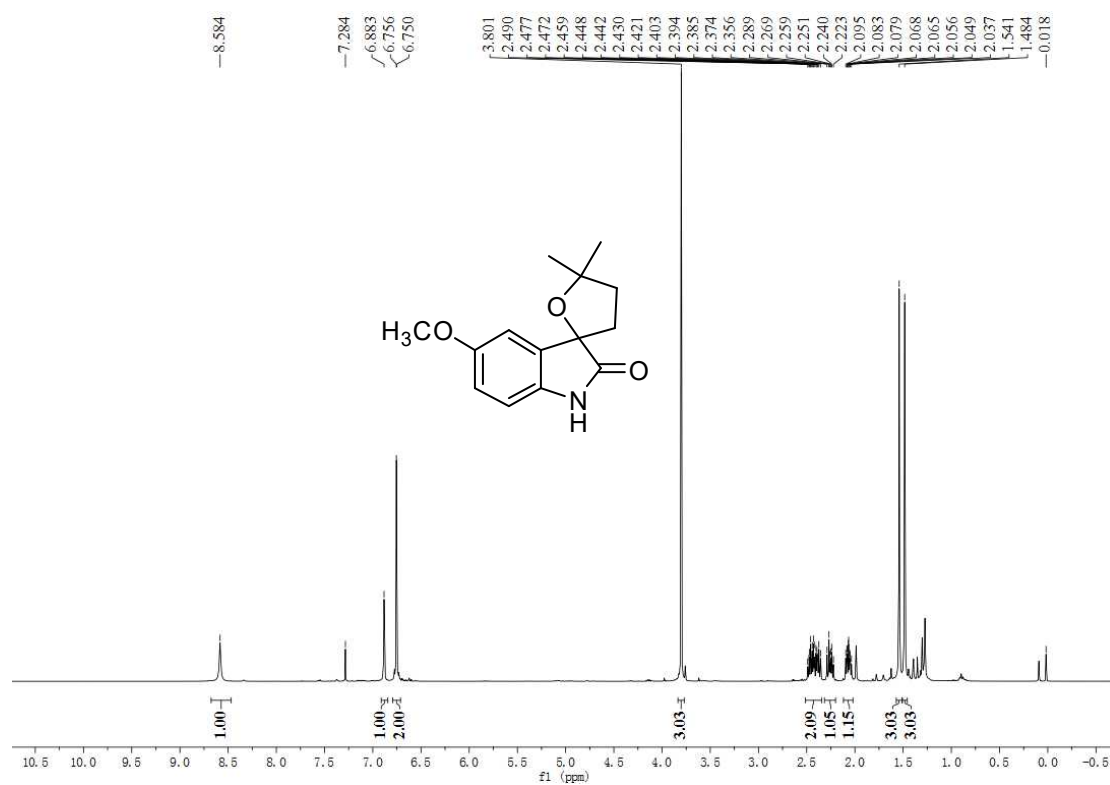

**Figure S5.  $^1\text{H}$  NMR Spectrum (400 MHz,  $\text{CDCl}_3$ ) of Compound **2c****

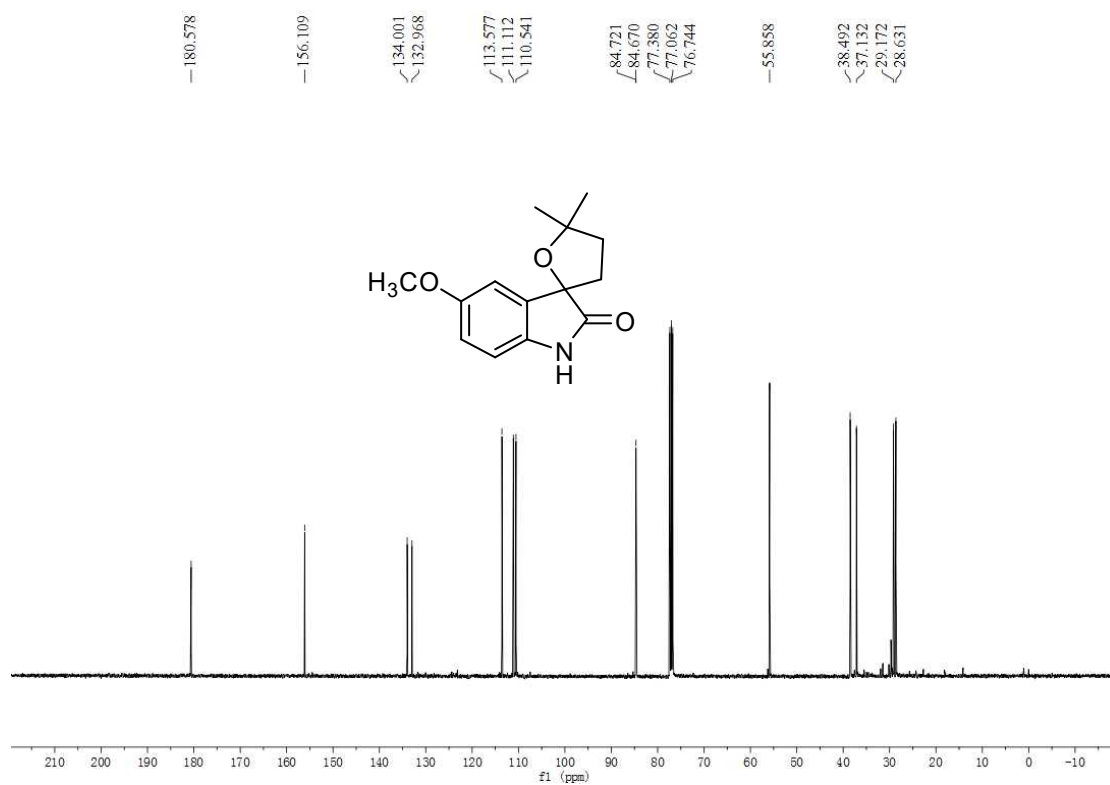

**Figure S6.  $^{13}\text{C}$  NMR Spectrum (100 MHz,  $\text{CDCl}_3$ ) of Compound **2c****

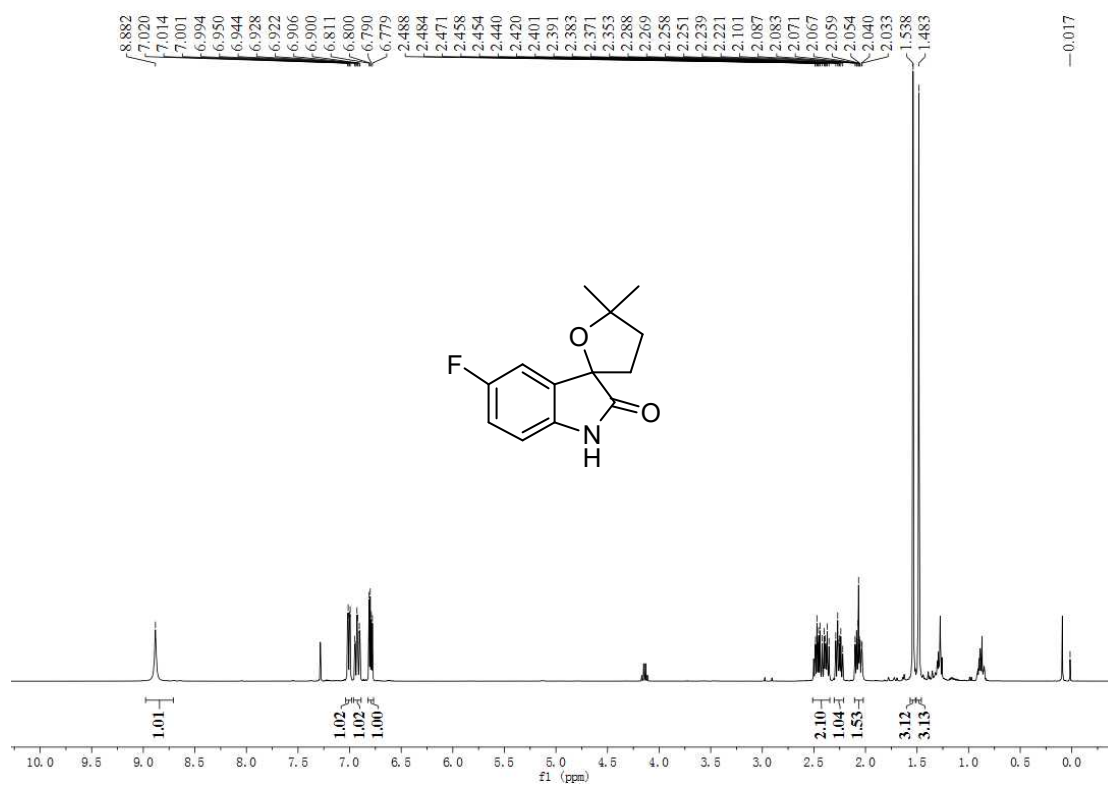

**Figure S7.** <sup>1</sup>H NMR Spectrum (400 MHz, CDCl<sub>3</sub>) of Compound 2d

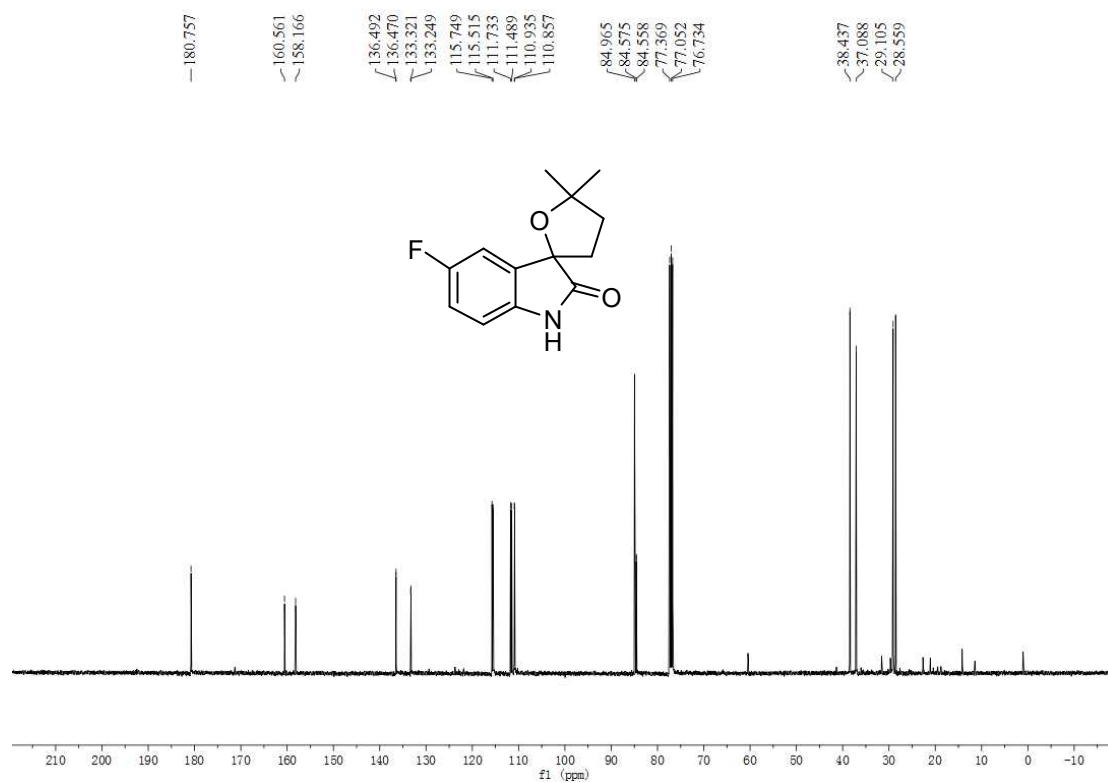

**Figure S8.** <sup>13</sup>C NMR Spectrum (100 MHz, CDCl<sub>3</sub>) of Compound 2d

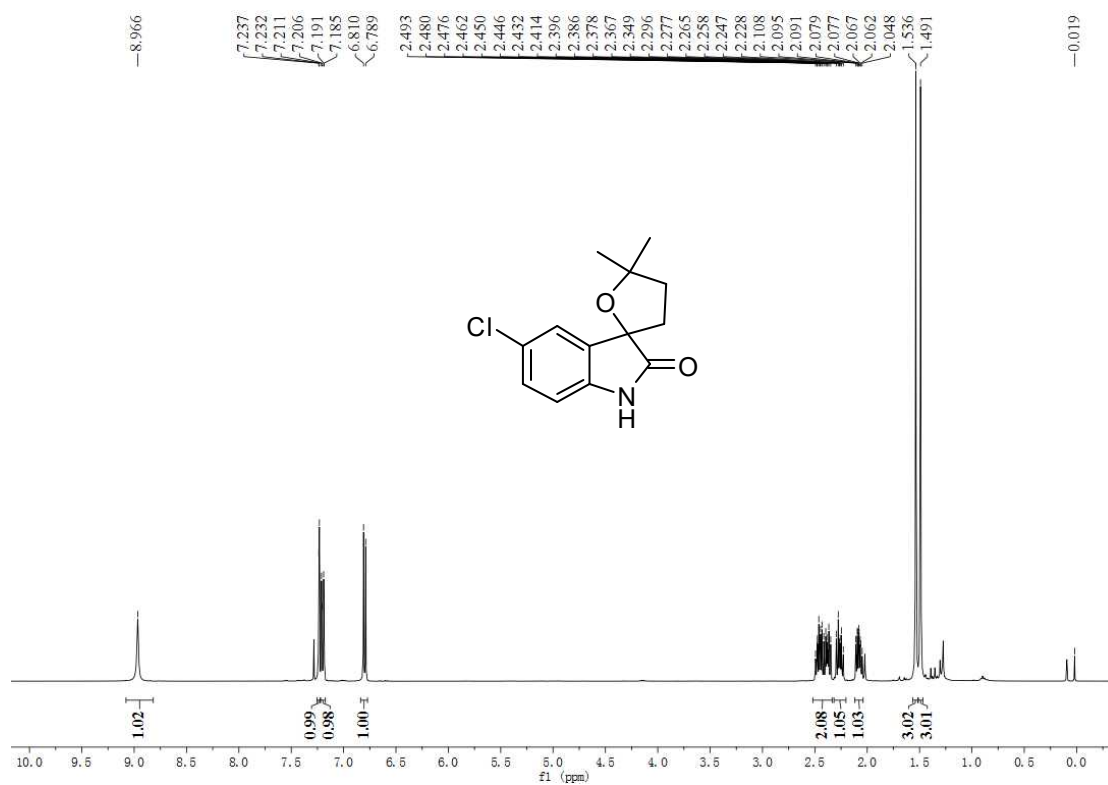

**Figure S9.** <sup>1</sup>H NMR Spectrum (400 MHz, CDCl<sub>3</sub>) of Compound 2e

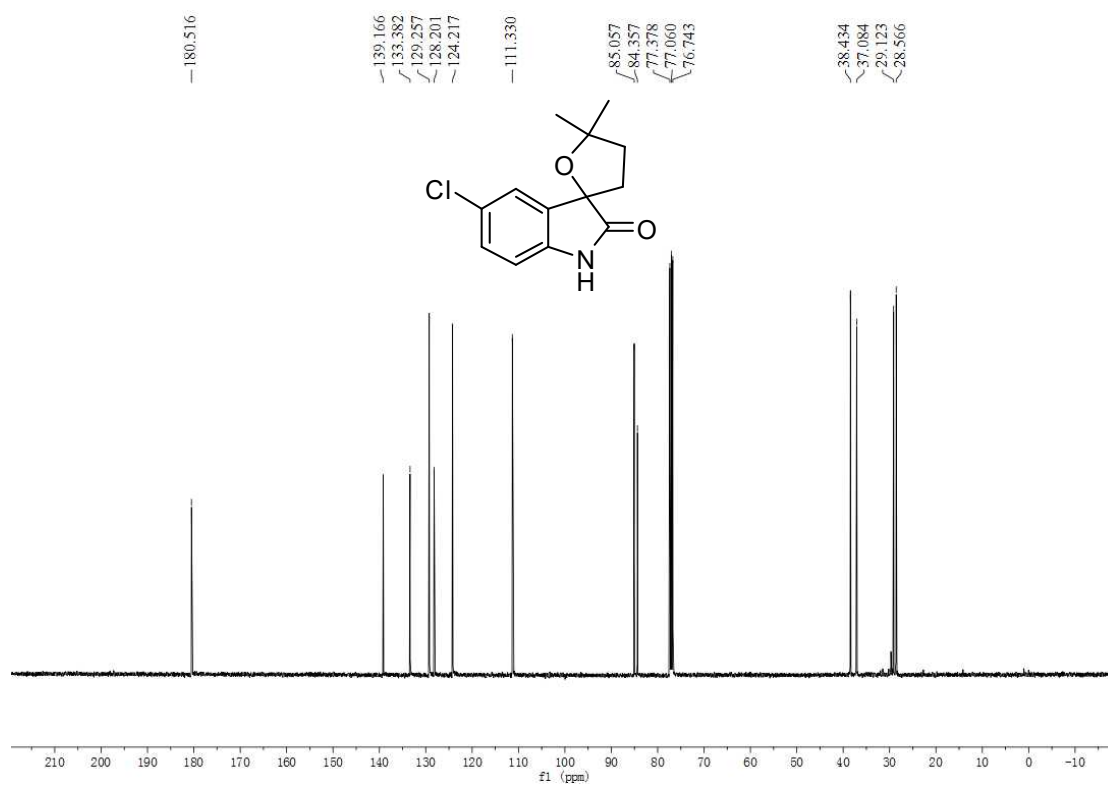

**Figure S10.** <sup>13</sup>C NMR Spectrum (100 MHz, CDCl<sub>3</sub>) of Compound 2e

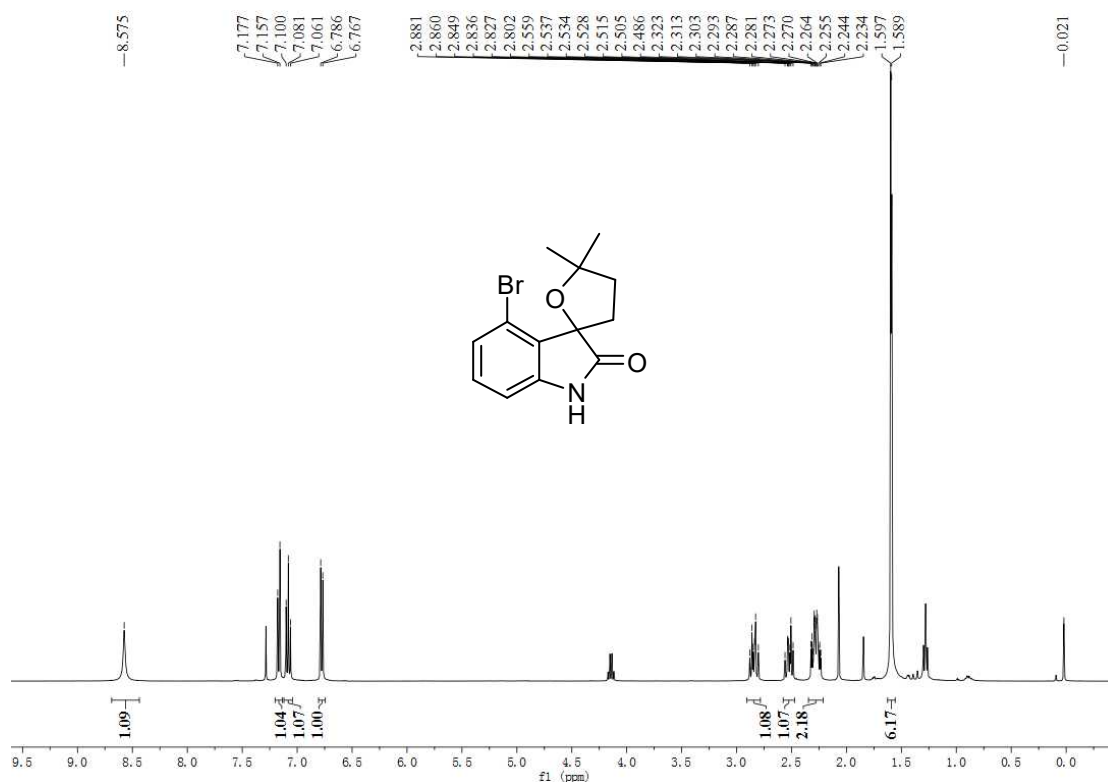

**Figure S11.** <sup>1</sup>H NMR Spectrum (400 MHz, CDCl<sub>3</sub>) of Compound 2f

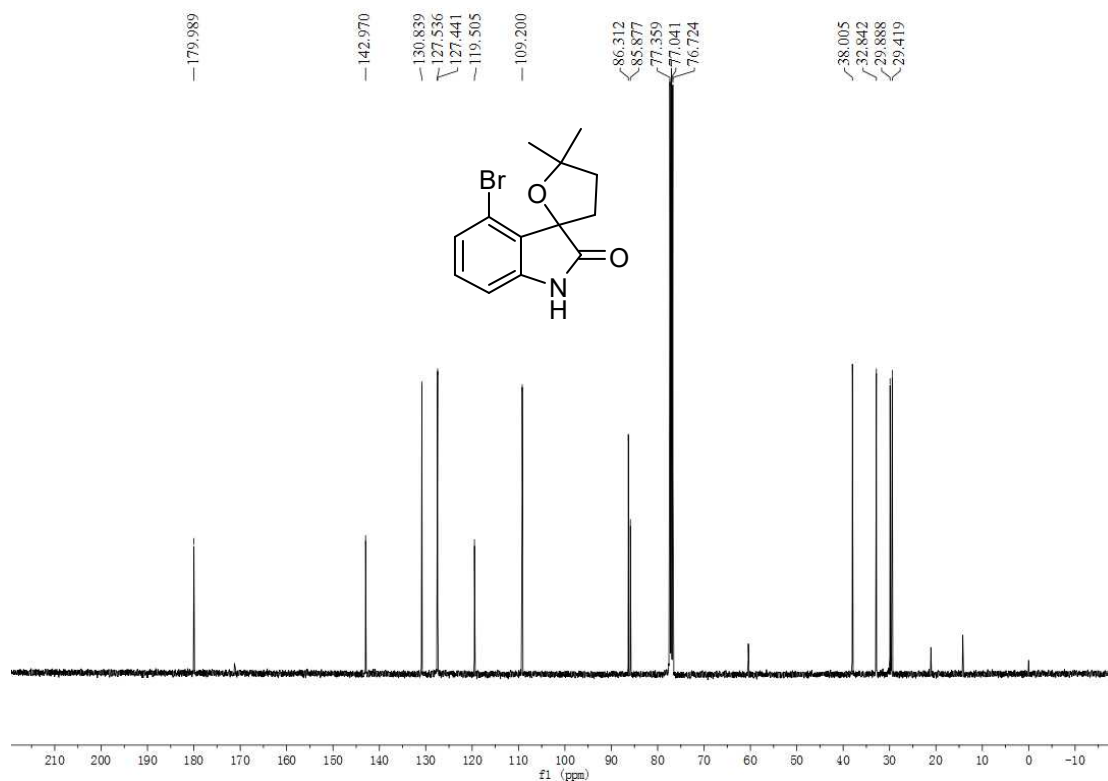

**Figure S12.** <sup>13</sup>C NMR Spectrum (100 MHz, CDCl<sub>3</sub>) of Compound 2f

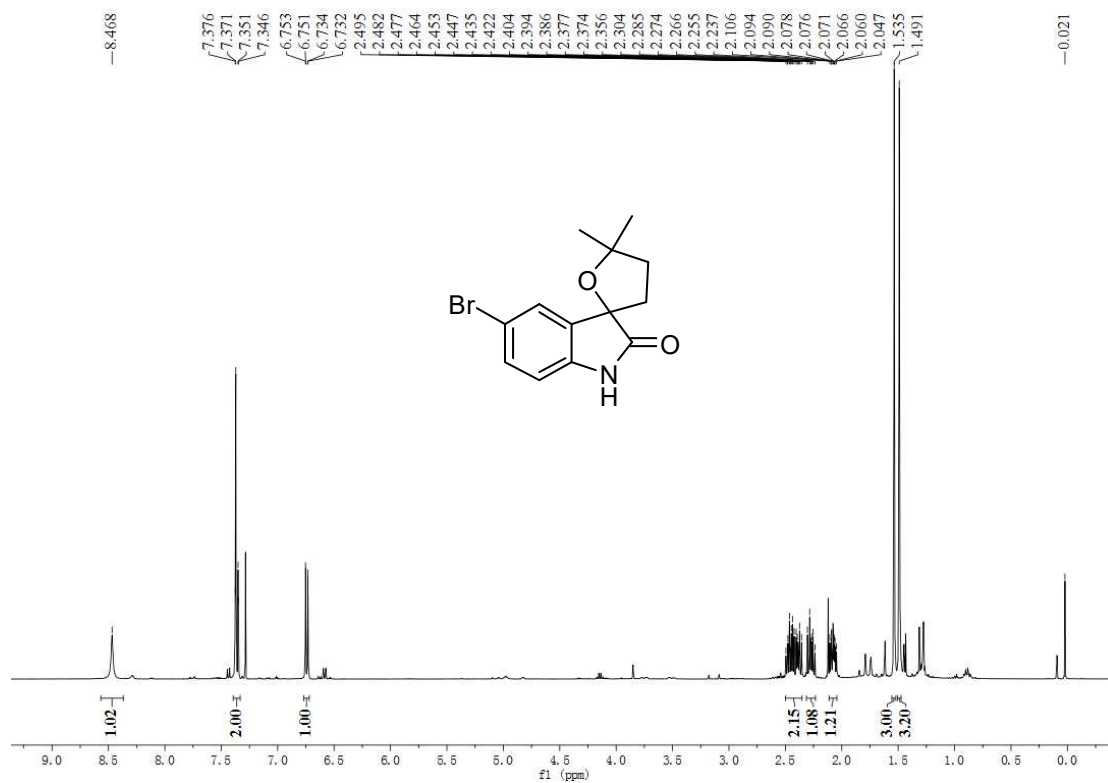

**Figure S13.** <sup>1</sup>H NMR Spectrum (400 MHz, CDCl<sub>3</sub>) of Compound 2g

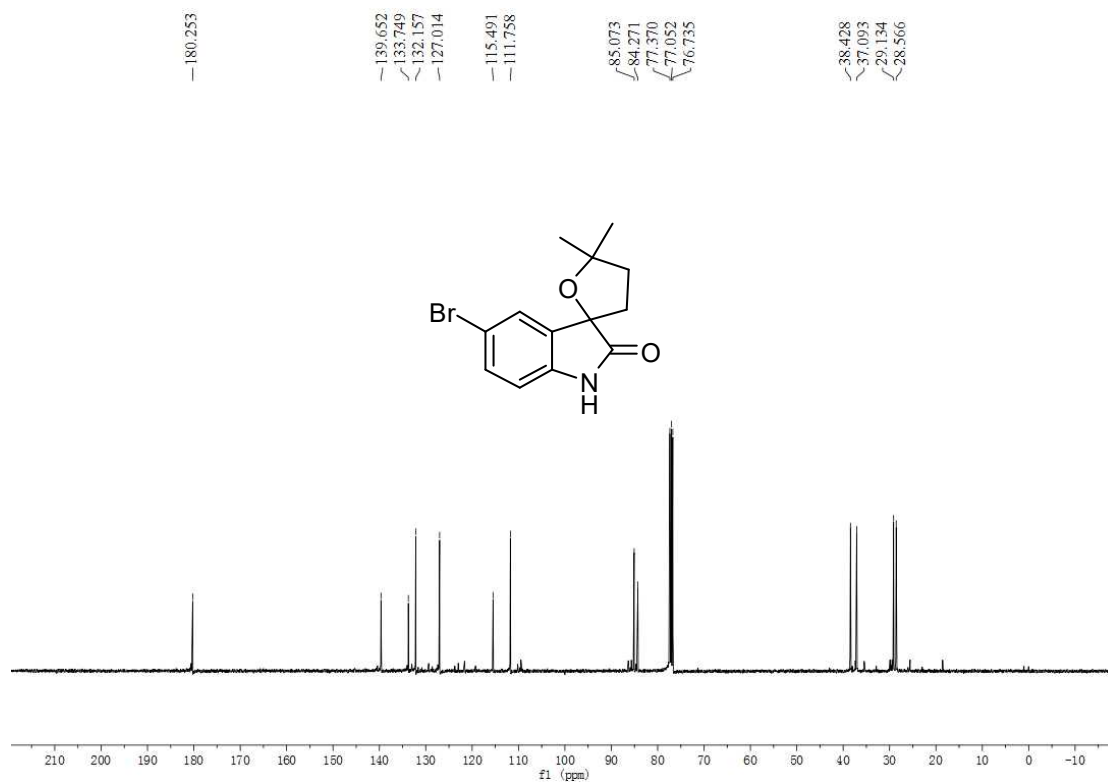

**Figure S14.** <sup>13</sup>C NMR Spectrum (100 MHz, CDCl<sub>3</sub>) of Compound 2g

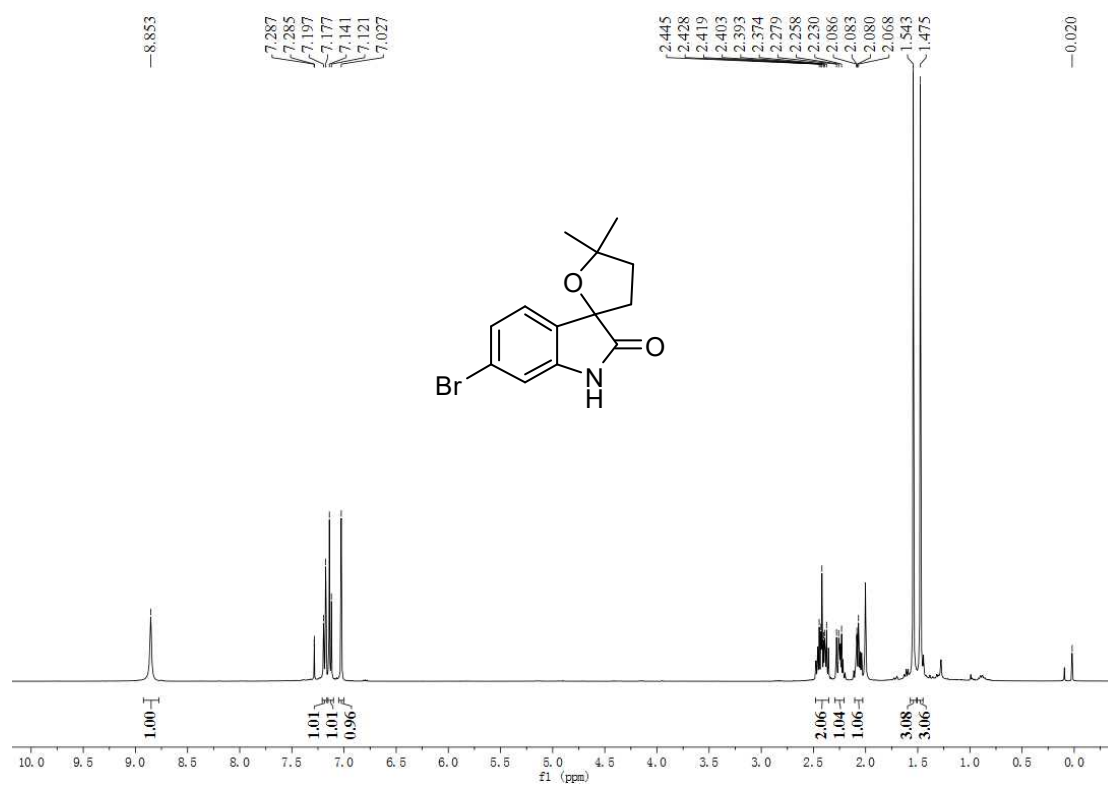

**Figure S15.** <sup>1</sup>H NMR Spectrum (400 MHz, CDCl<sub>3</sub>) of Compound **2h**

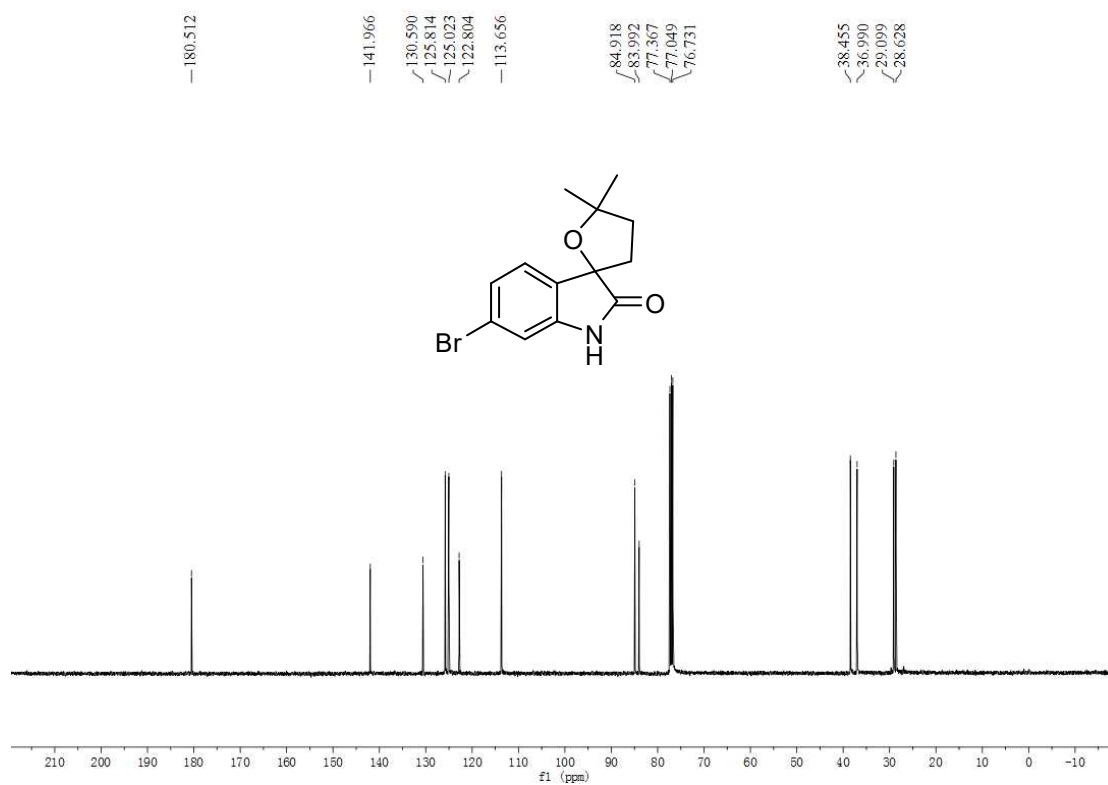

**Figure S16.** <sup>13</sup>C NMR Spectrum (100 MHz, CDCl<sub>3</sub>) of Compound **2h**

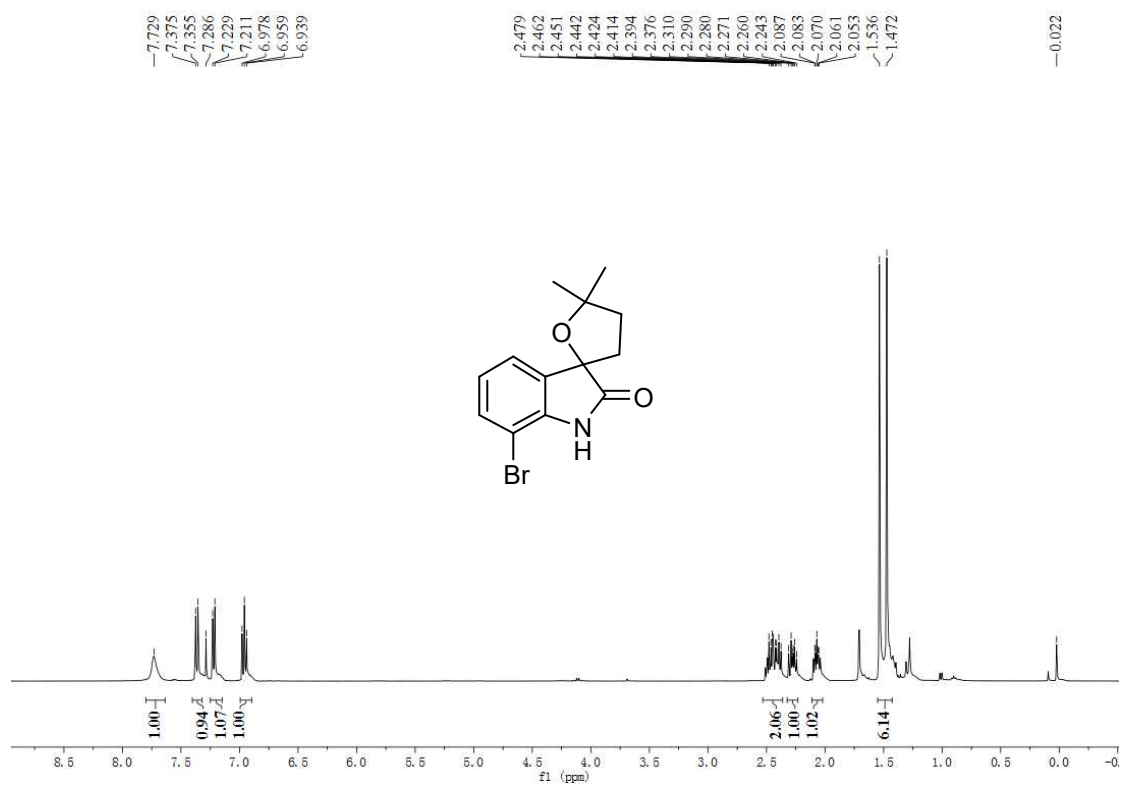

**Figure S17.** <sup>1</sup>H NMR Spectrum (400 MHz, CDCl<sub>3</sub>) of Compound 2i

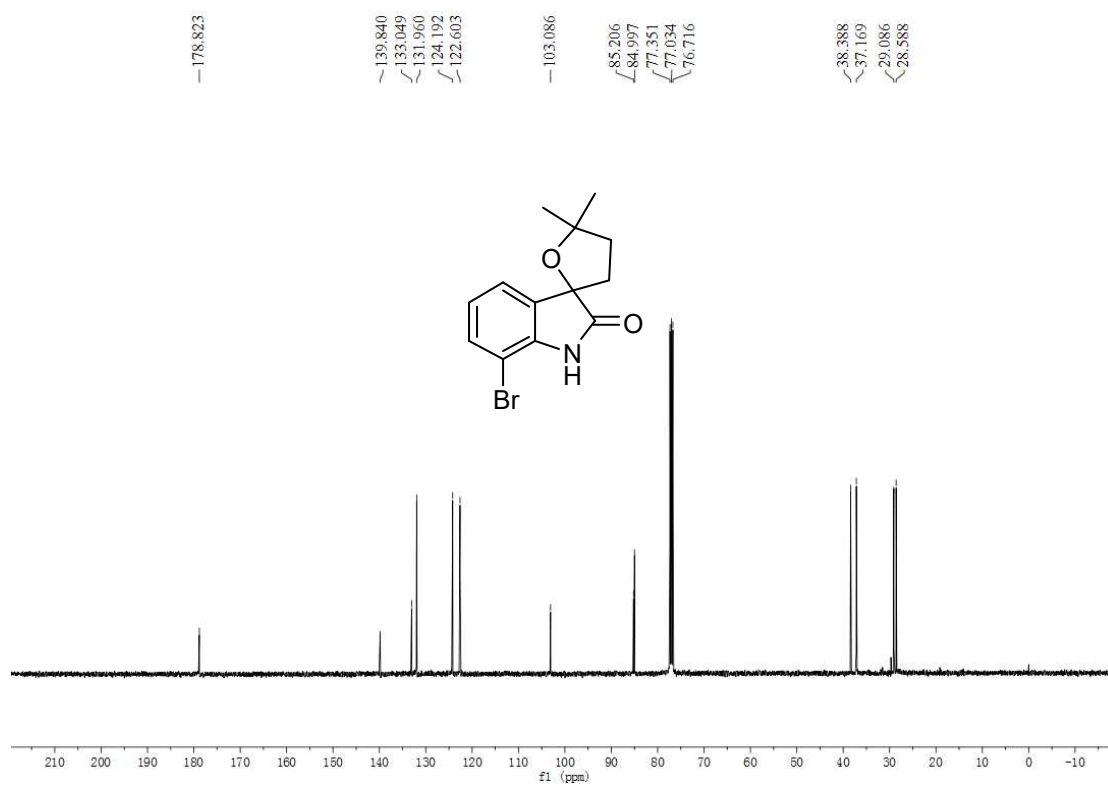

**Figure S18.** <sup>13</sup>C NMR Spectrum (100 MHz, CDCl<sub>3</sub>) of Compound 2i

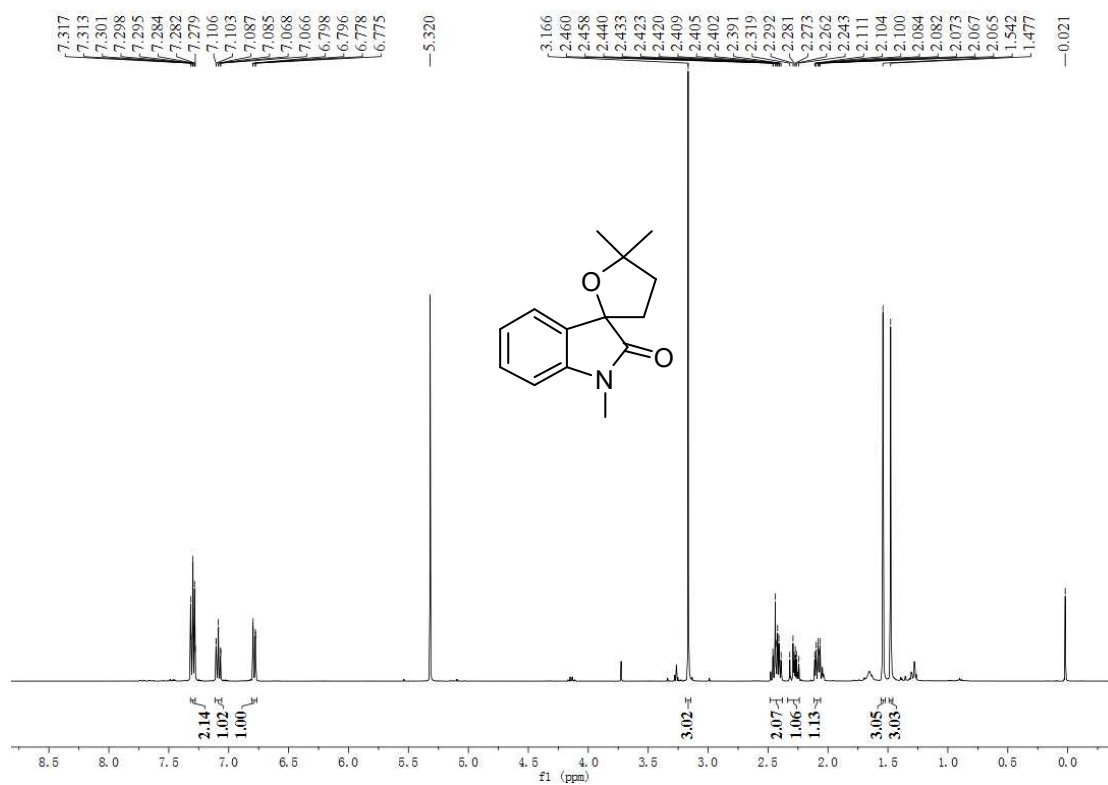

**Figure S19.** <sup>1</sup>H NMR Spectrum (400 MHz, CDCl<sub>3</sub>) of Compound 2j

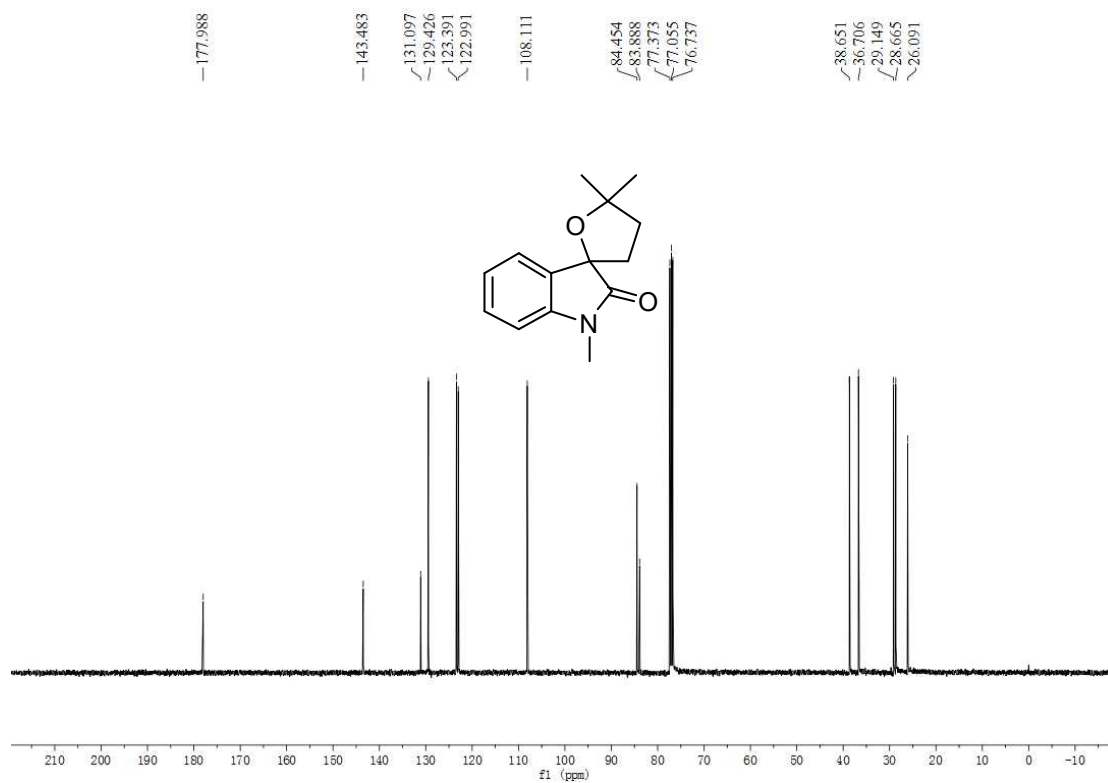

**Figure S20.** <sup>13</sup>C NMR Spectrum (100 MHz, CDCl<sub>3</sub>) of Compound 2j

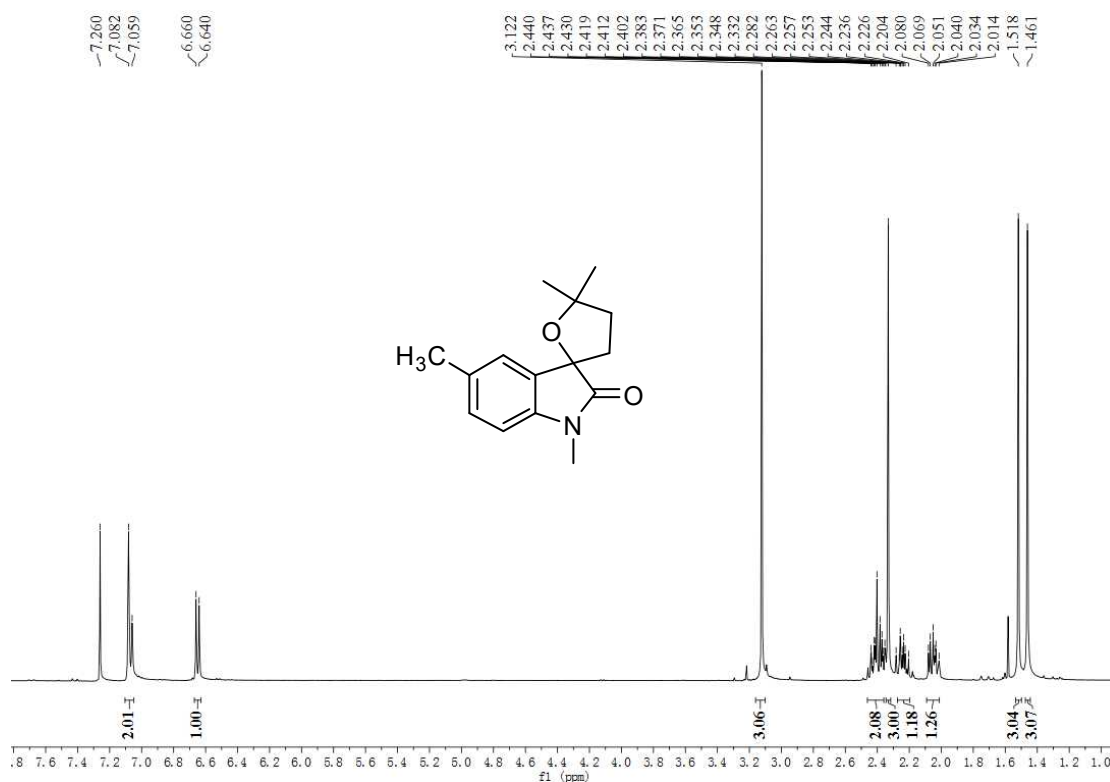

**Figure S21.** <sup>1</sup>H NMR Spectrum (400 MHz, CDCl<sub>3</sub>) of Compound 2k

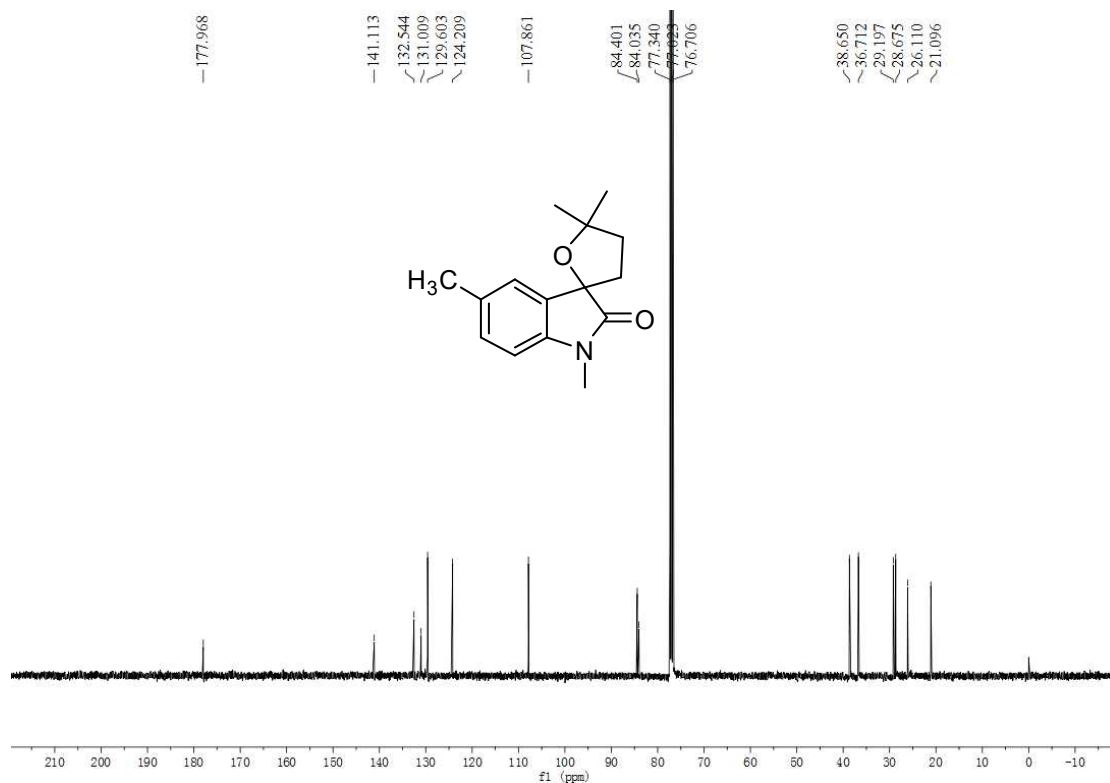

**Figure S22.** <sup>13</sup>C NMR Spectrum (100 MHz, CDCl<sub>3</sub>) of Compound 2k

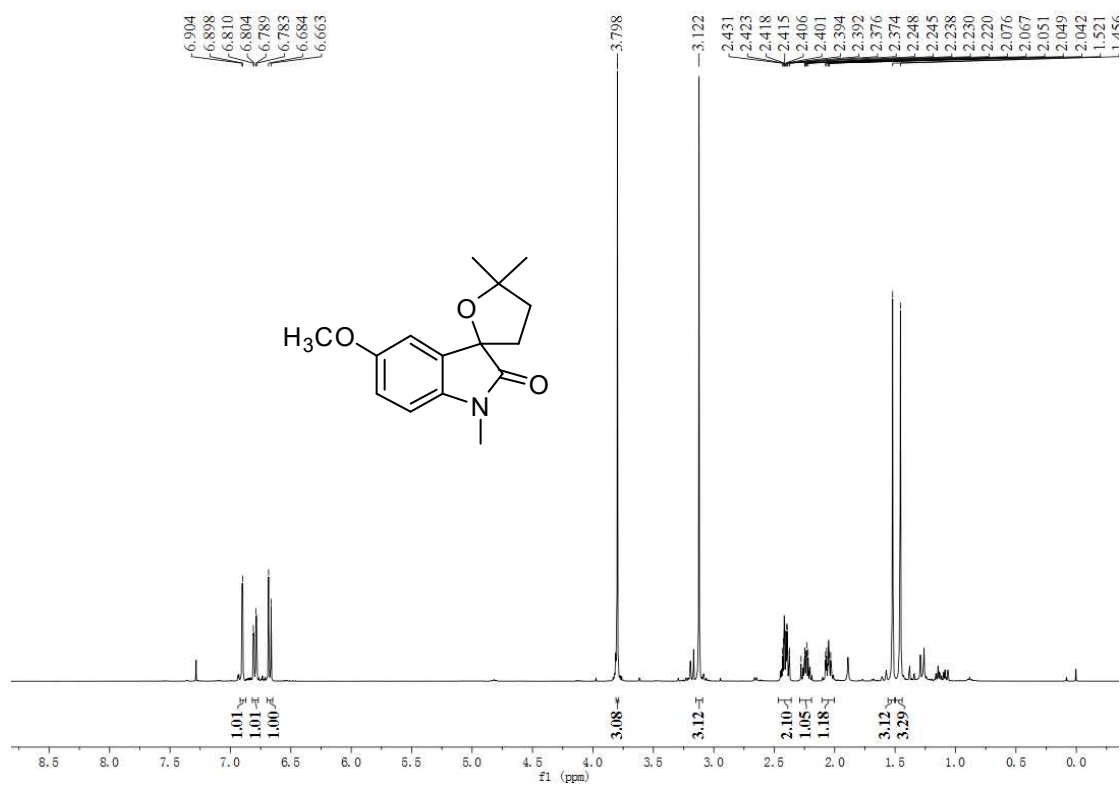

**Figure S23.** <sup>1</sup>H NMR Spectrum (400 MHz, CDCl<sub>3</sub>) of Compound **21**

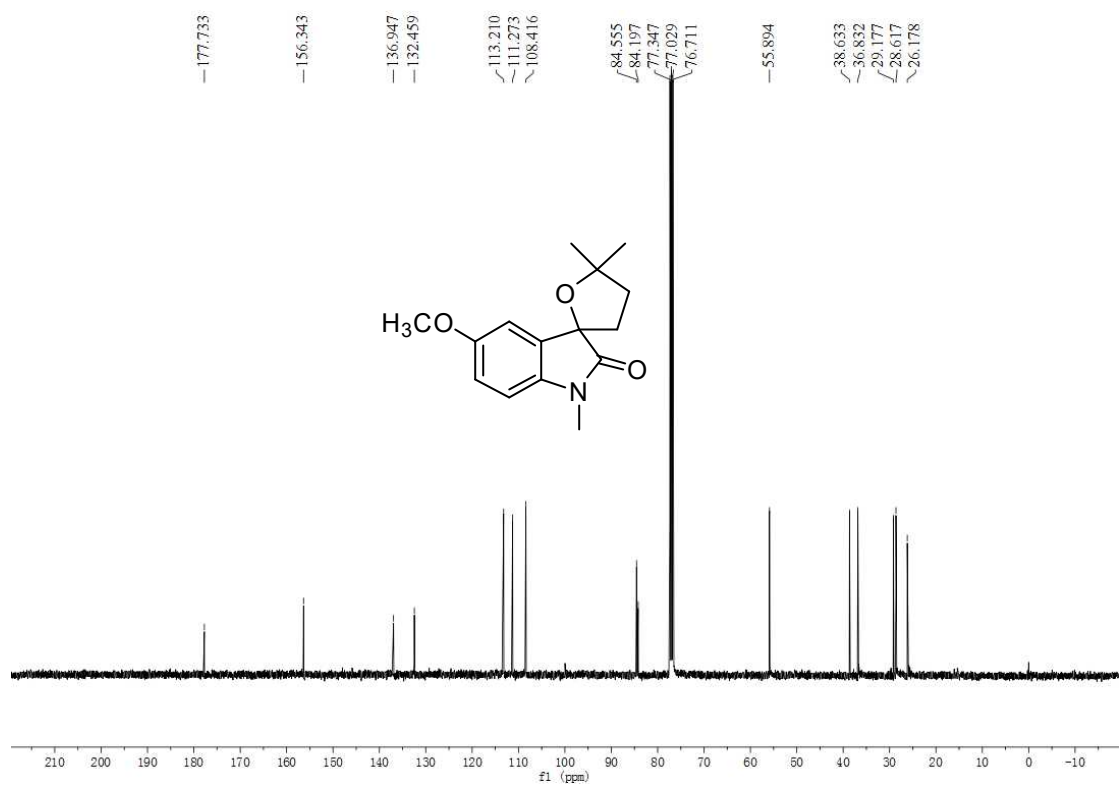

**Figure S24.** <sup>13</sup>C NMR Spectrum (100 MHz, CDCl<sub>3</sub>) of Compound **21**

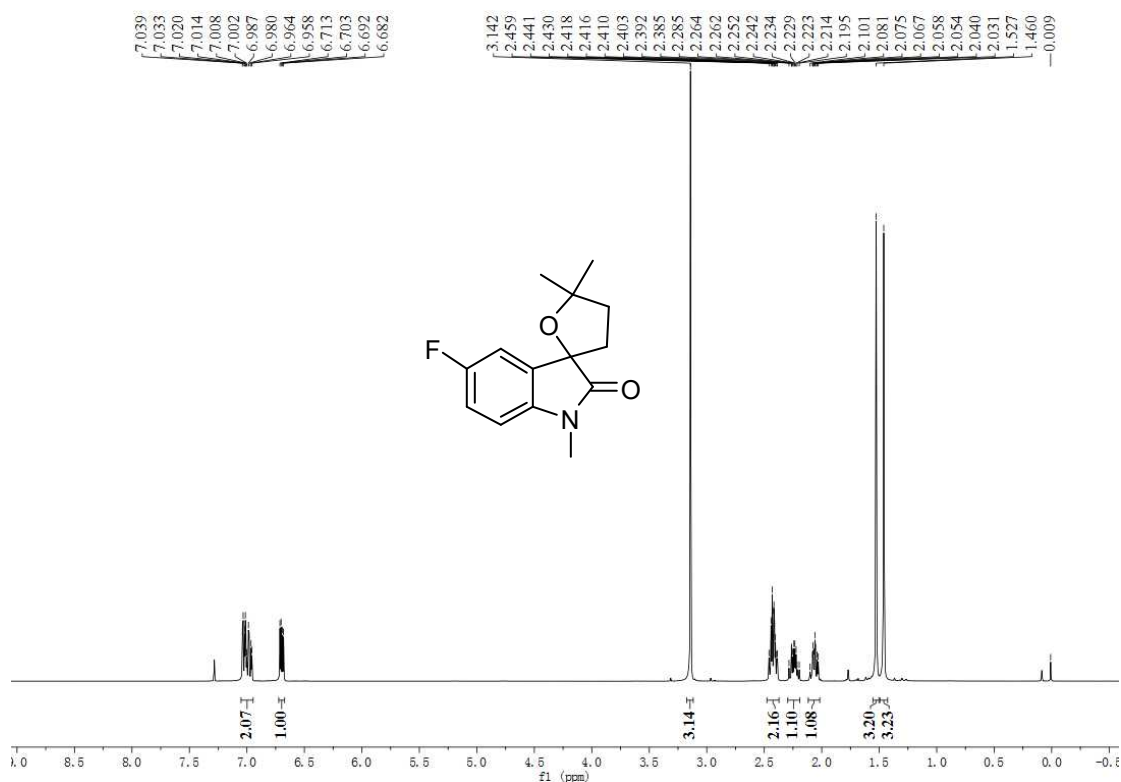

**Figure S25.** <sup>1</sup>H NMR Spectrum (400 MHz, CDCl<sub>3</sub>) of Compound **2m**

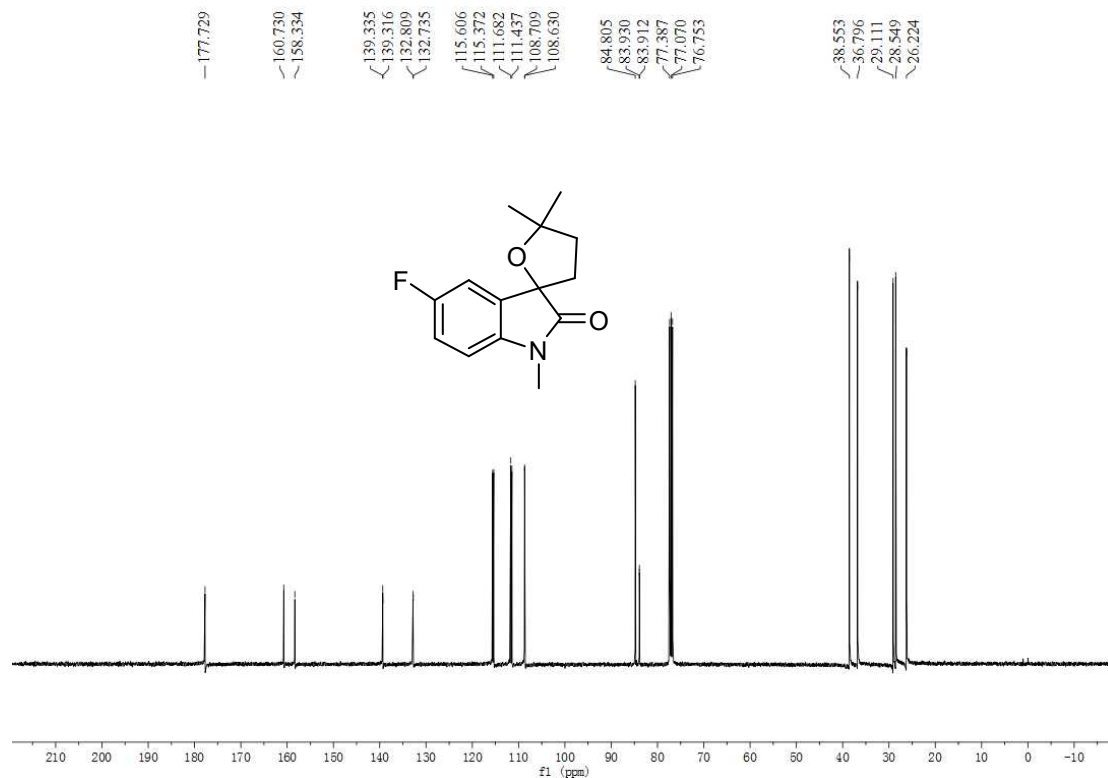

**Figure S26.** <sup>13</sup>C NMR Spectrum (100 MHz, CDCl<sub>3</sub>) of Compound **2m**

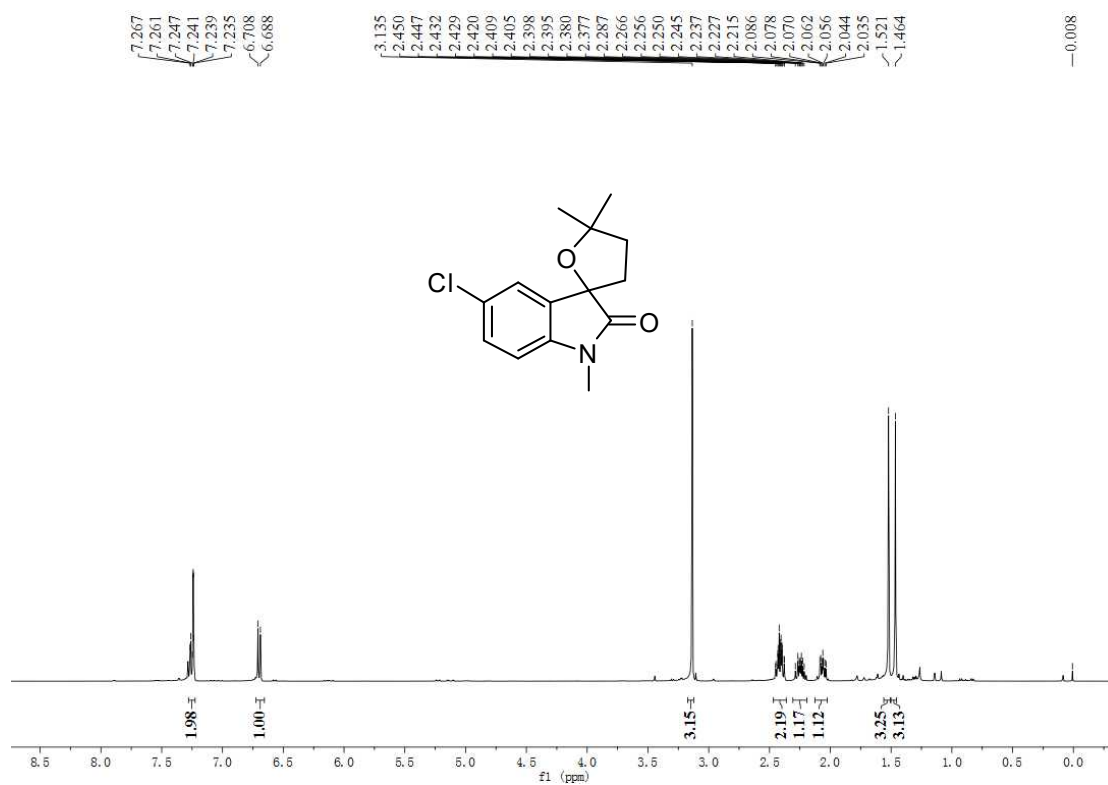

**Figure S27.** <sup>1</sup>H NMR Spectrum (400 MHz, CDCl<sub>3</sub>) of Compound 2n

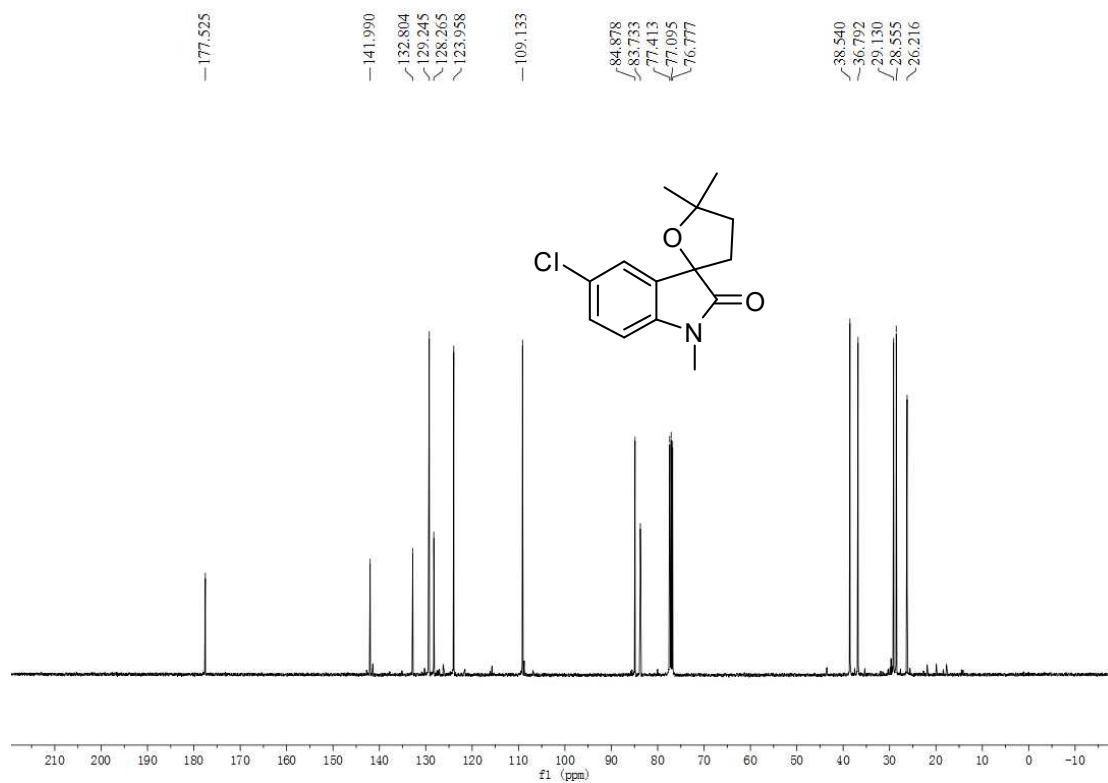

**Figure S28.** <sup>13</sup>C NMR Spectrum (100 MHz, CDCl<sub>3</sub>) of Compound 2n

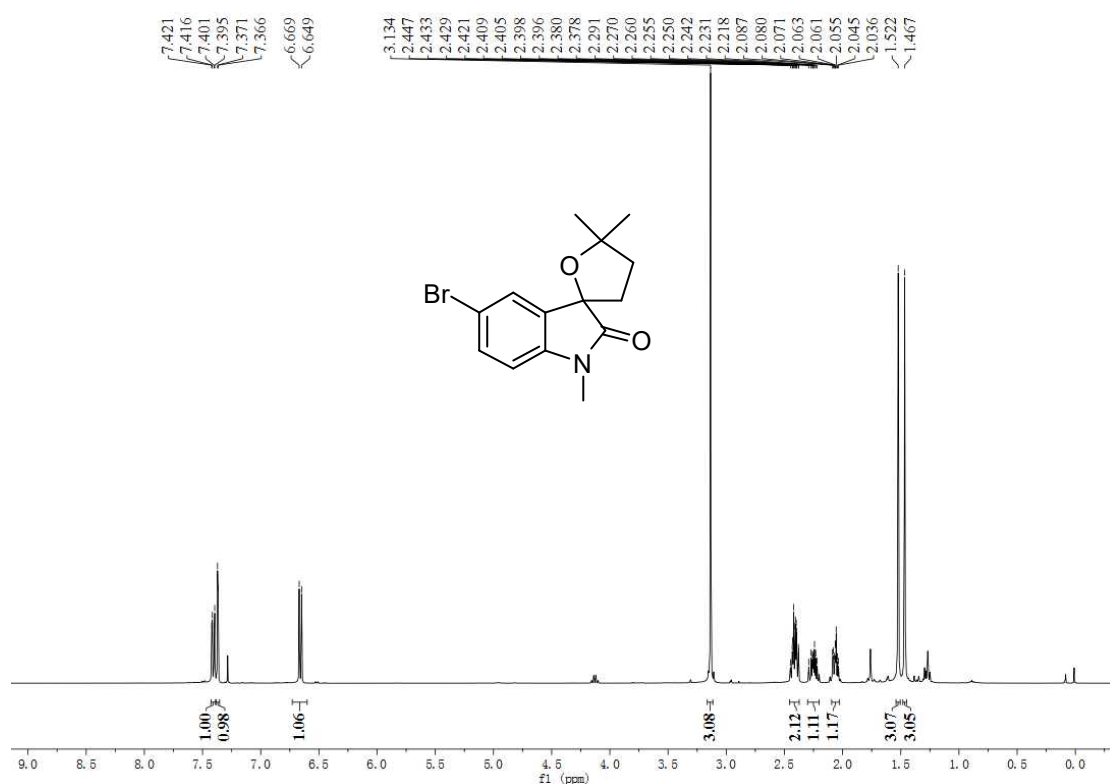

**Figure S29.** <sup>1</sup>H NMR Spectrum (400 MHz, CDCl<sub>3</sub>) of Compound 2o

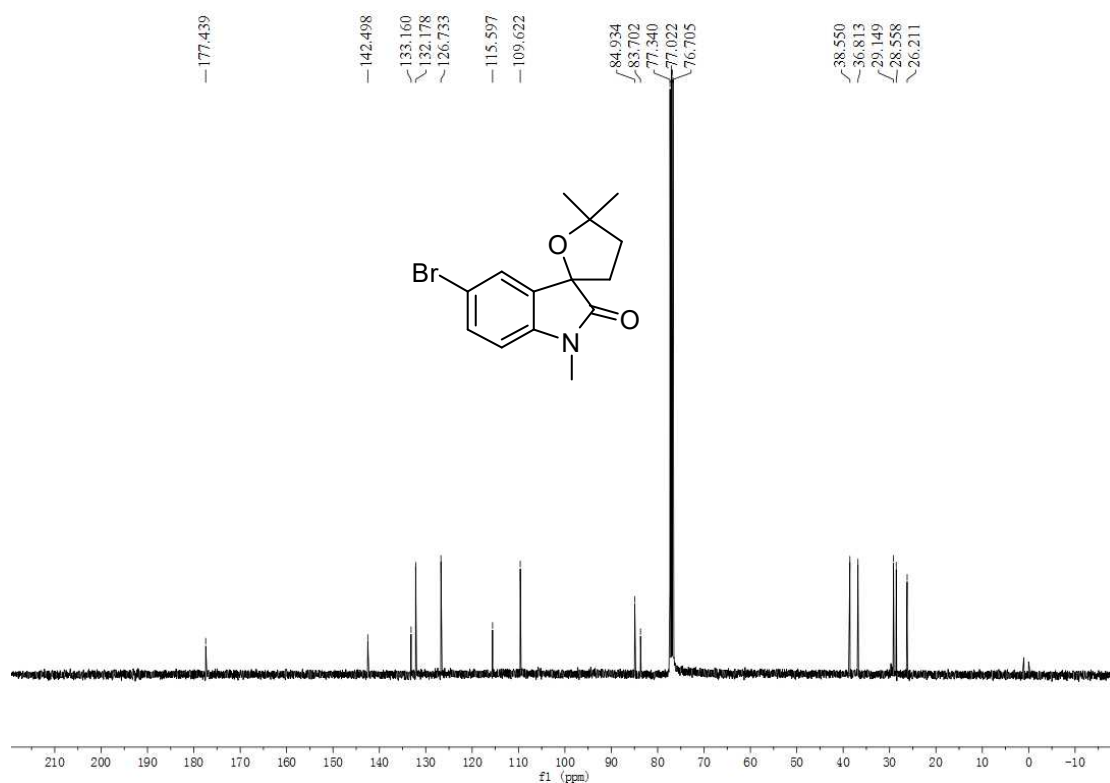

**Figure S30.** <sup>13</sup>C NMR Spectrum (100 MHz, CDCl<sub>3</sub>) of Compound 2o

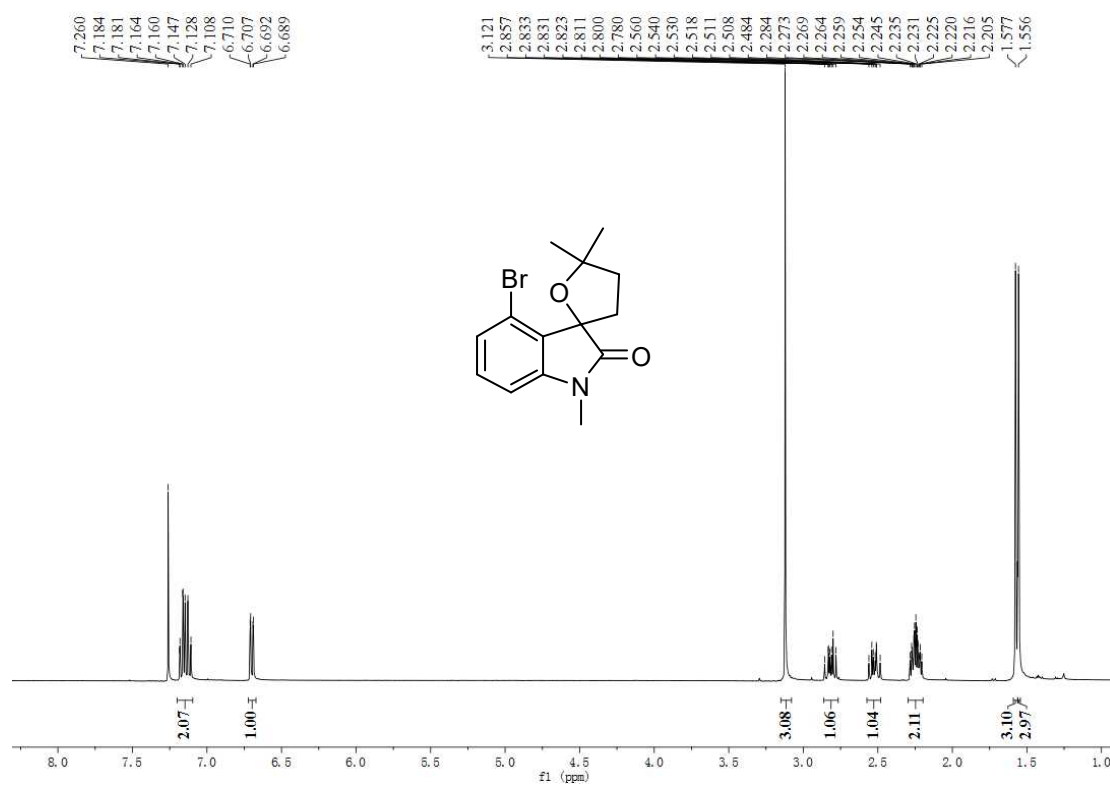

**Figure S31.** <sup>1</sup>H NMR Spectrum (400 MHz, CDCl<sub>3</sub>) of Compound 2p

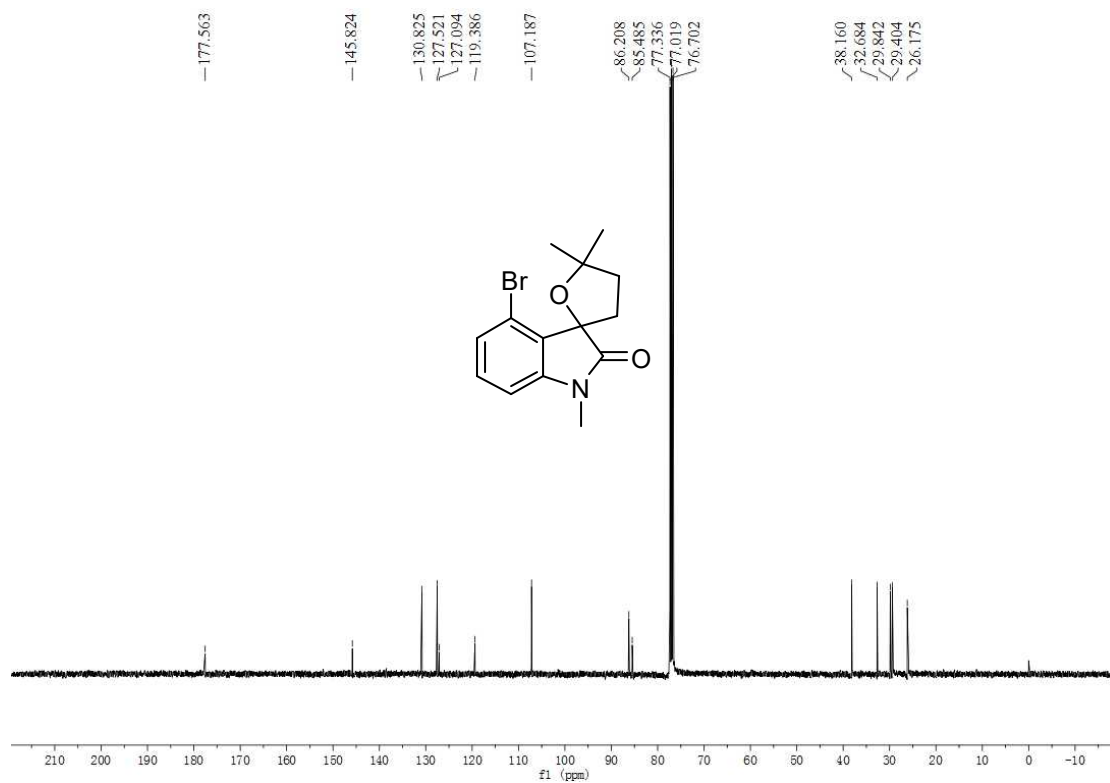

**Figure S32.** <sup>13</sup>C NMR Spectrum (100 MHz, CDCl<sub>3</sub>) of Compound 2p

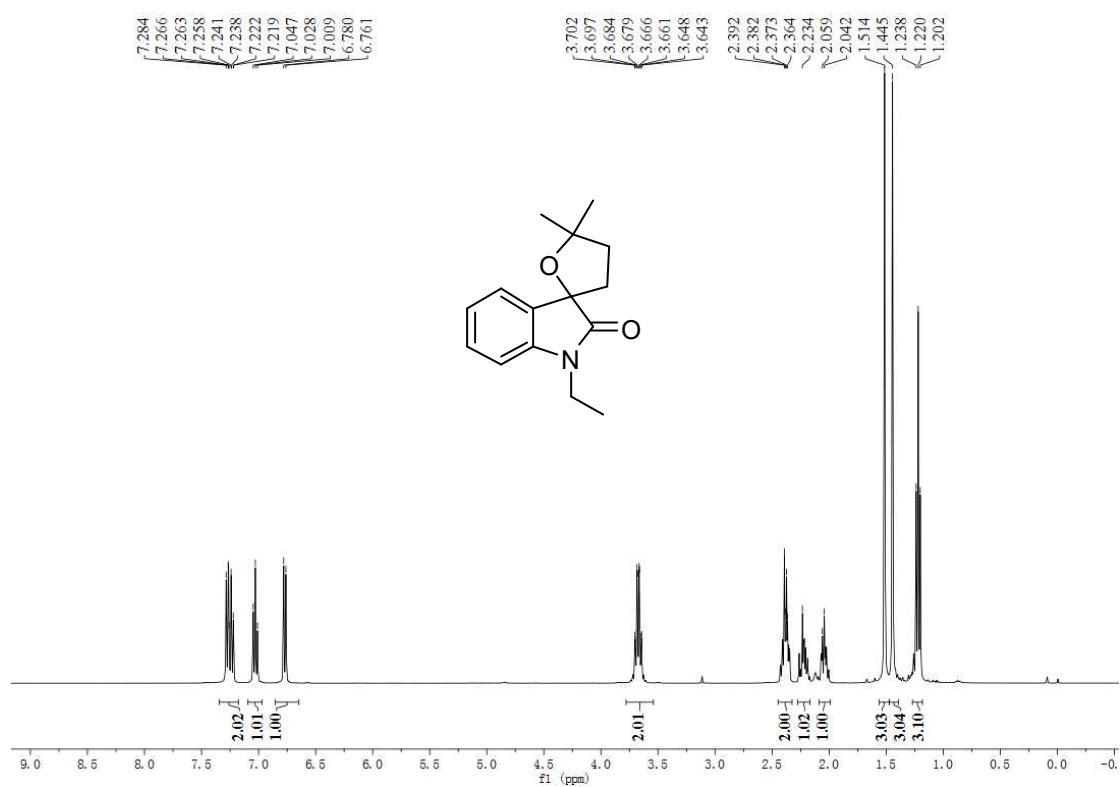

**Figure S33.** <sup>1</sup>H NMR Spectrum (400 MHz, CDCl<sub>3</sub>) of Compound 2q

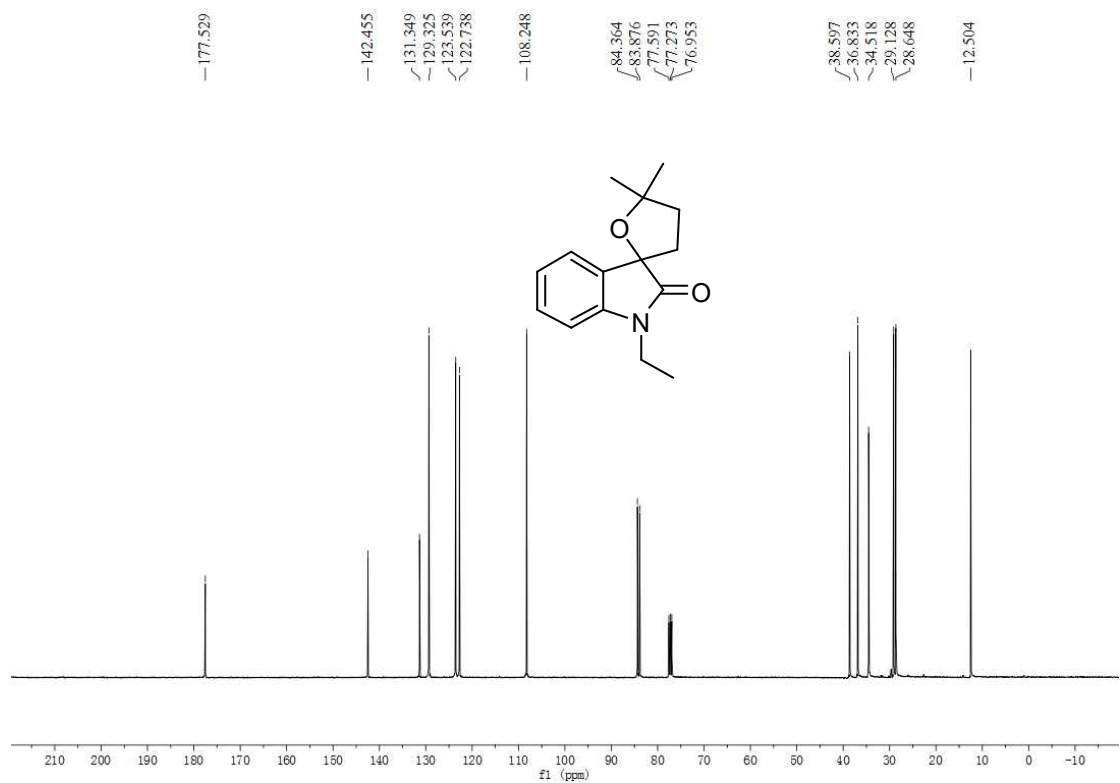

**Figure S34.** <sup>13</sup>C NMR Spectrum (100 MHz, CDCl<sub>3</sub>) of Compound 2q

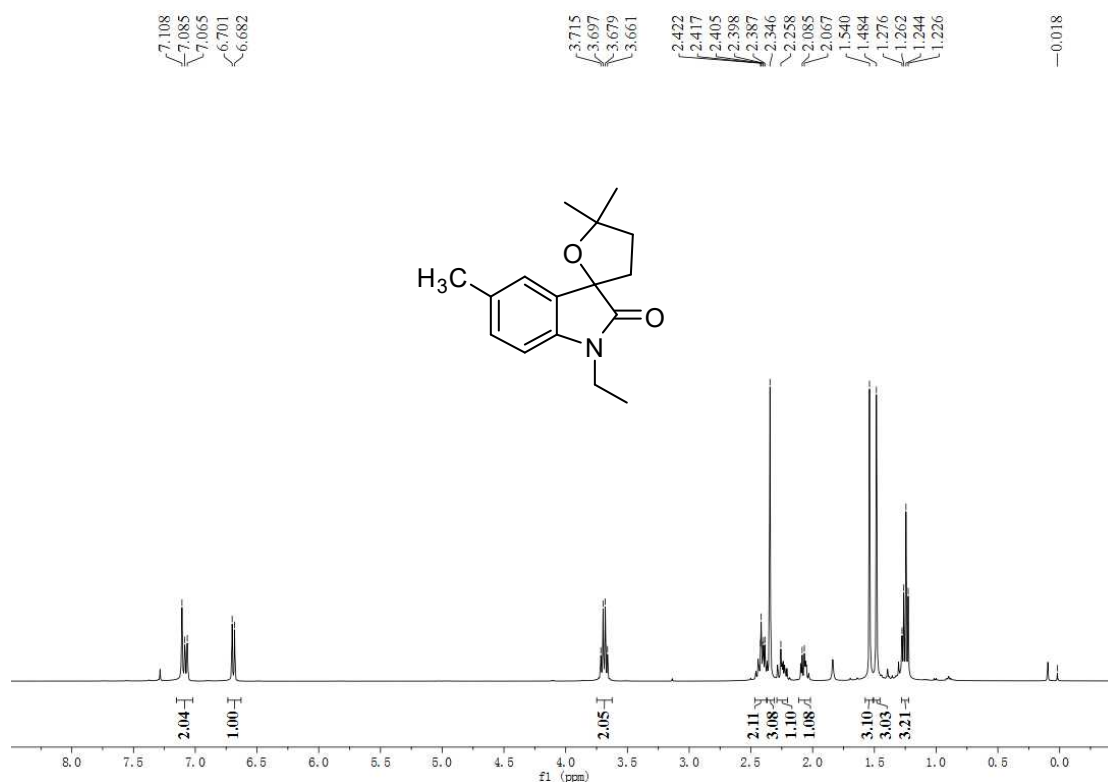

**Figure S35.** <sup>1</sup>H NMR Spectrum (400 MHz, CDCl<sub>3</sub>) of Compound 2r

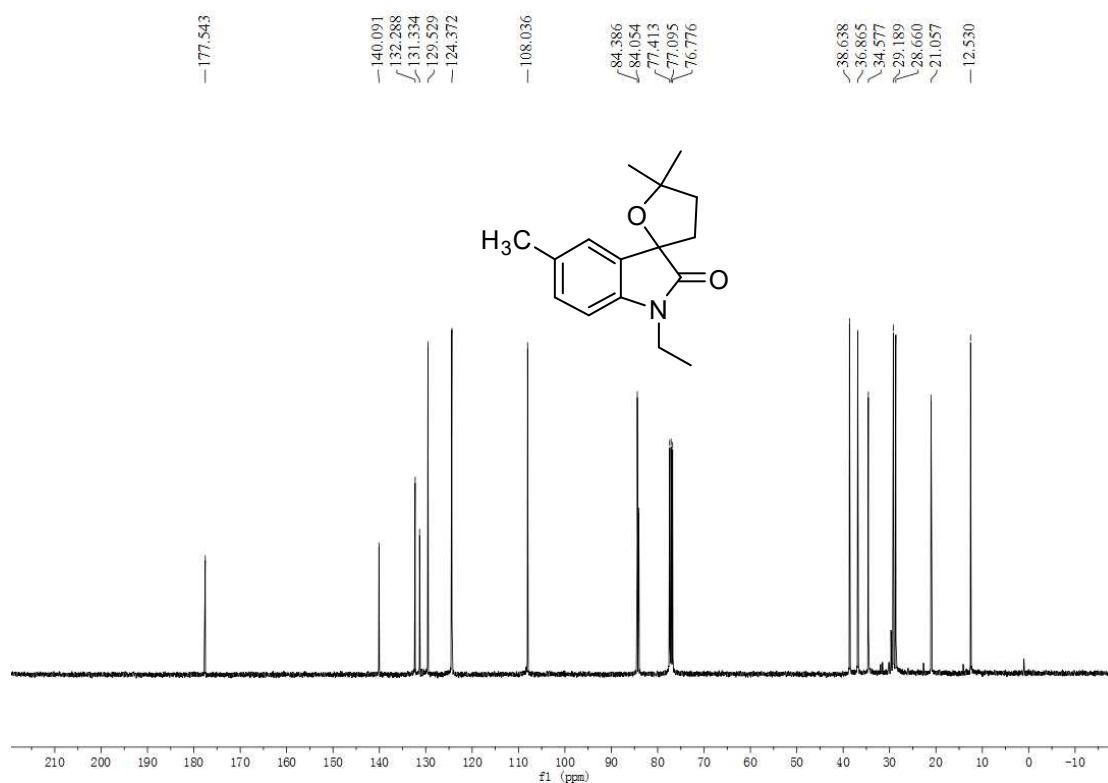

**Figure S36.** <sup>13</sup>C NMR Spectrum (100 MHz, CDCl<sub>3</sub>) of Compound 2r

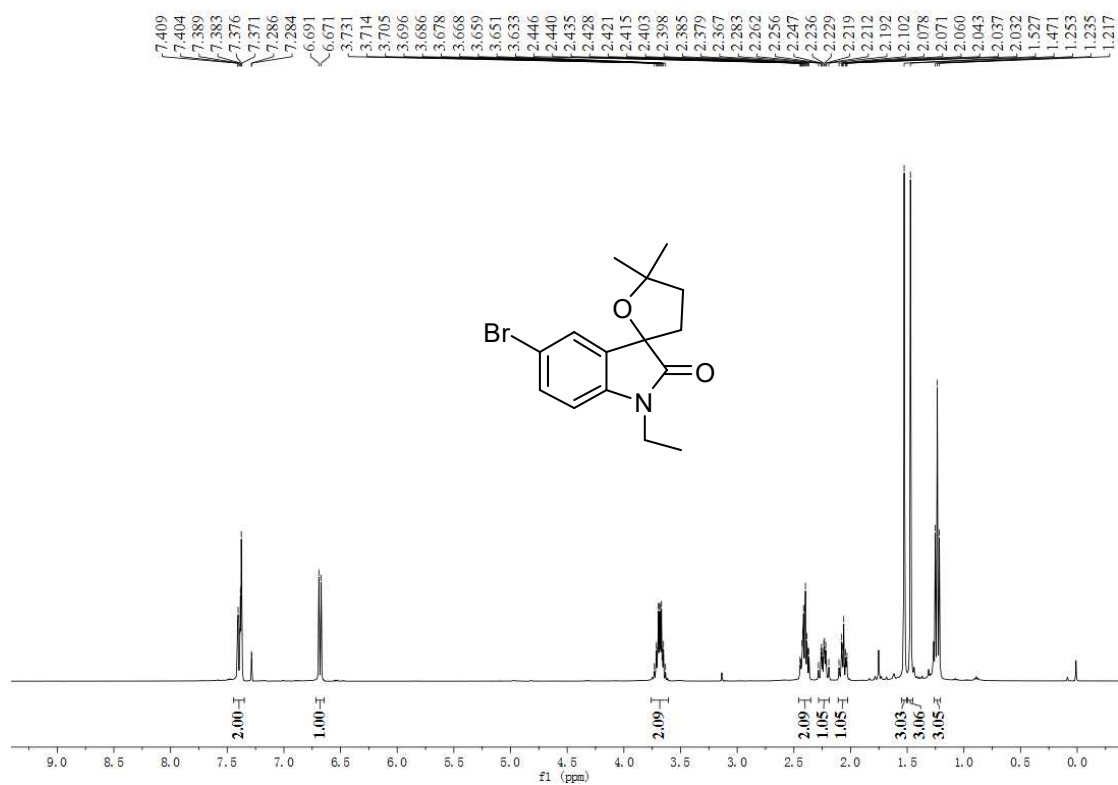

**Figure S37.** <sup>1</sup>H NMR Spectrum (400 MHz, CDCl<sub>3</sub>) of Compound 2s

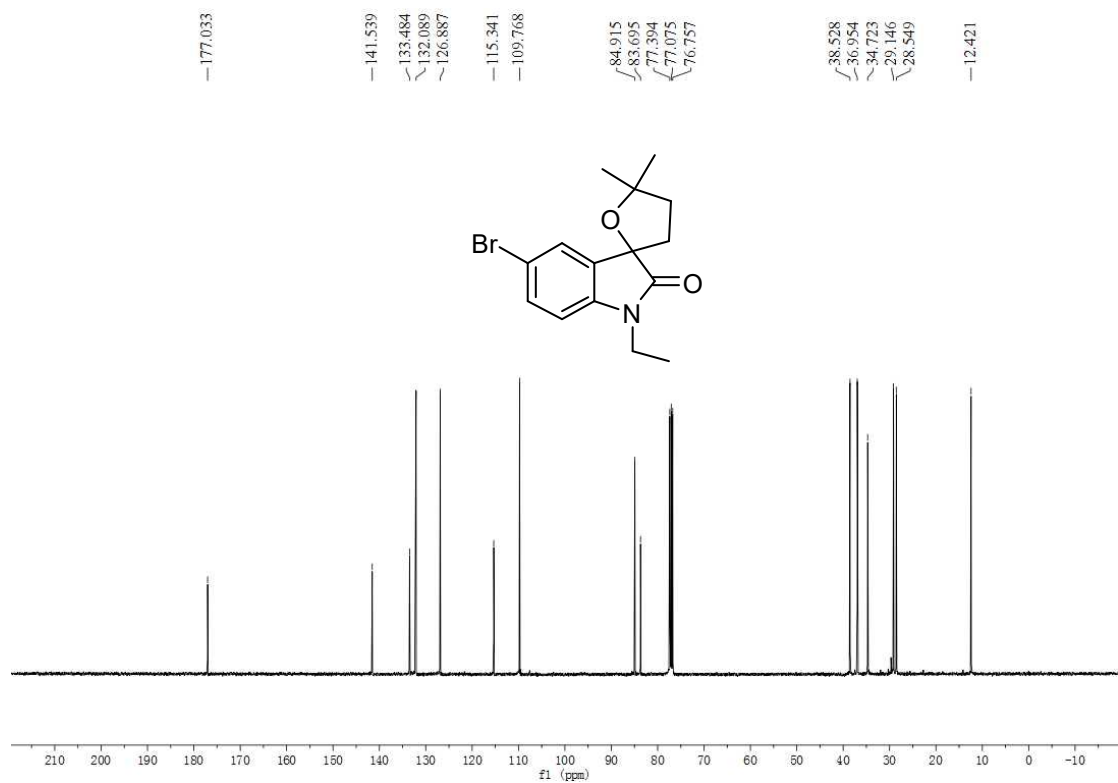

**Figure S38.** <sup>13</sup>C NMR Spectrum (100 MHz, CDCl<sub>3</sub>) of Compound 2s

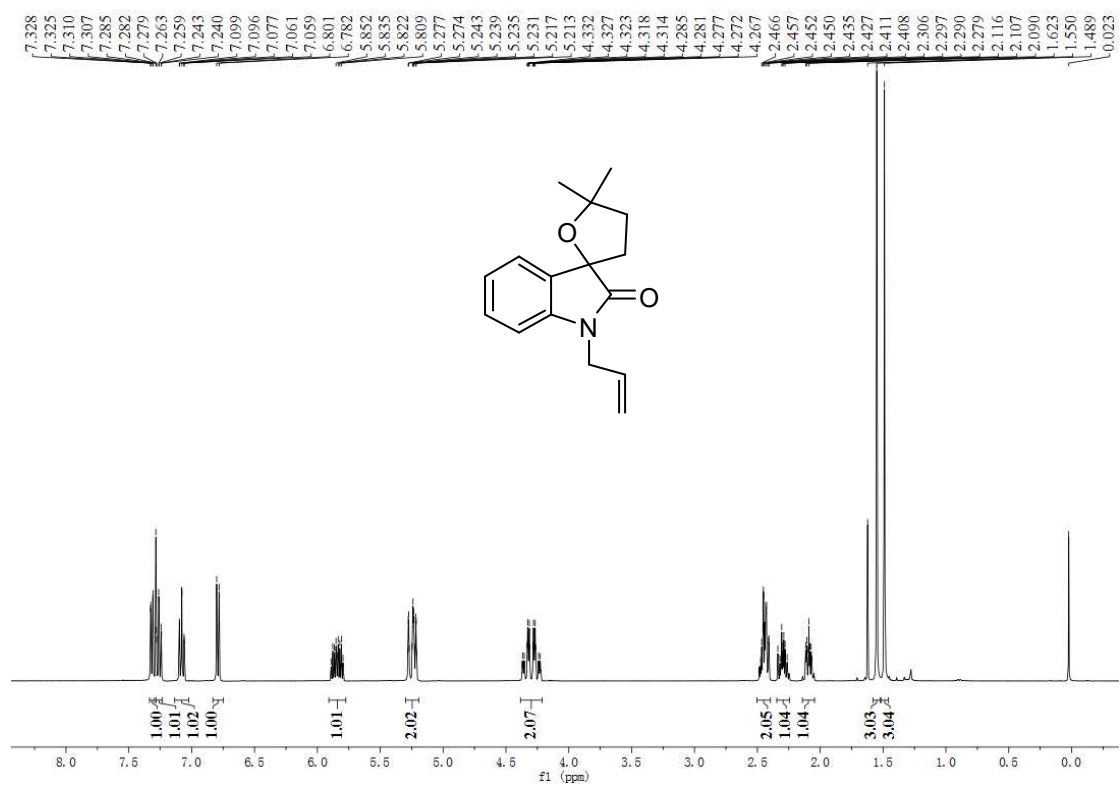

Figure S39. <sup>1</sup>H NMR Spectrum (400 MHz, CDCl<sub>3</sub>) of Compound 2t

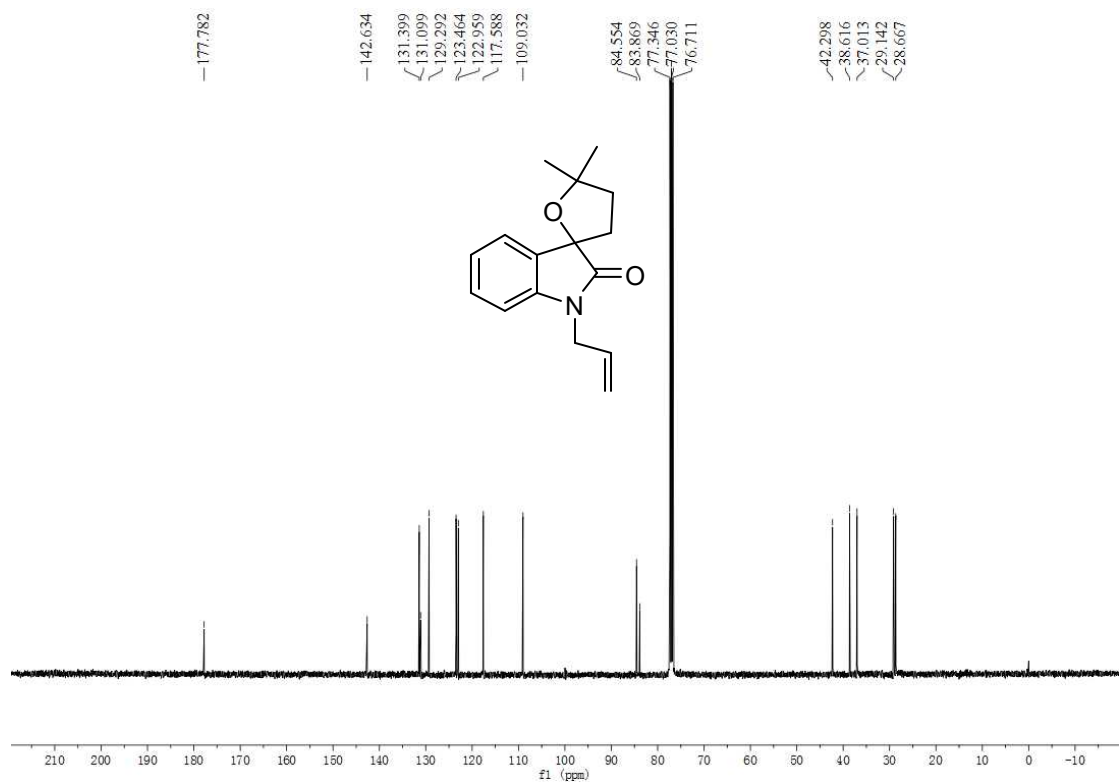

Figure S40. <sup>13</sup>C NMR Spectrum (100 MHz, CDCl<sub>3</sub>) of Compound 2t

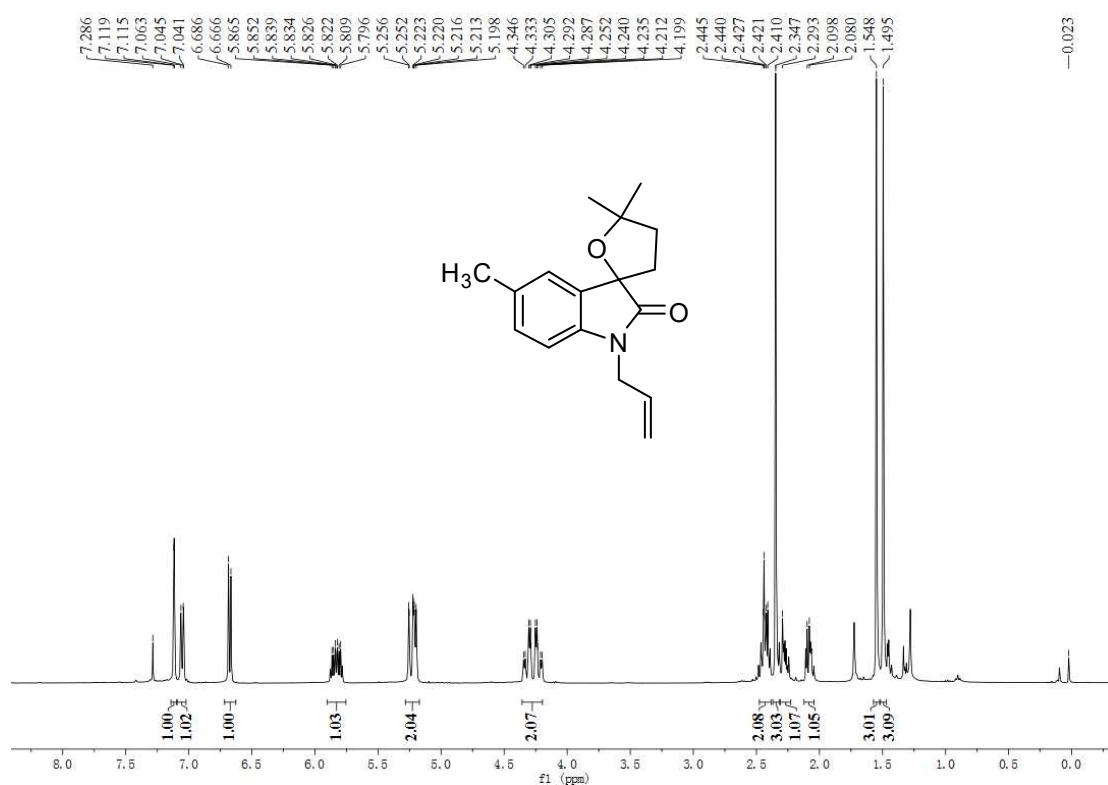

Figure S41. <sup>1</sup>H NMR Spectrum (400 MHz, CDCl<sub>3</sub>) of Compound 2u

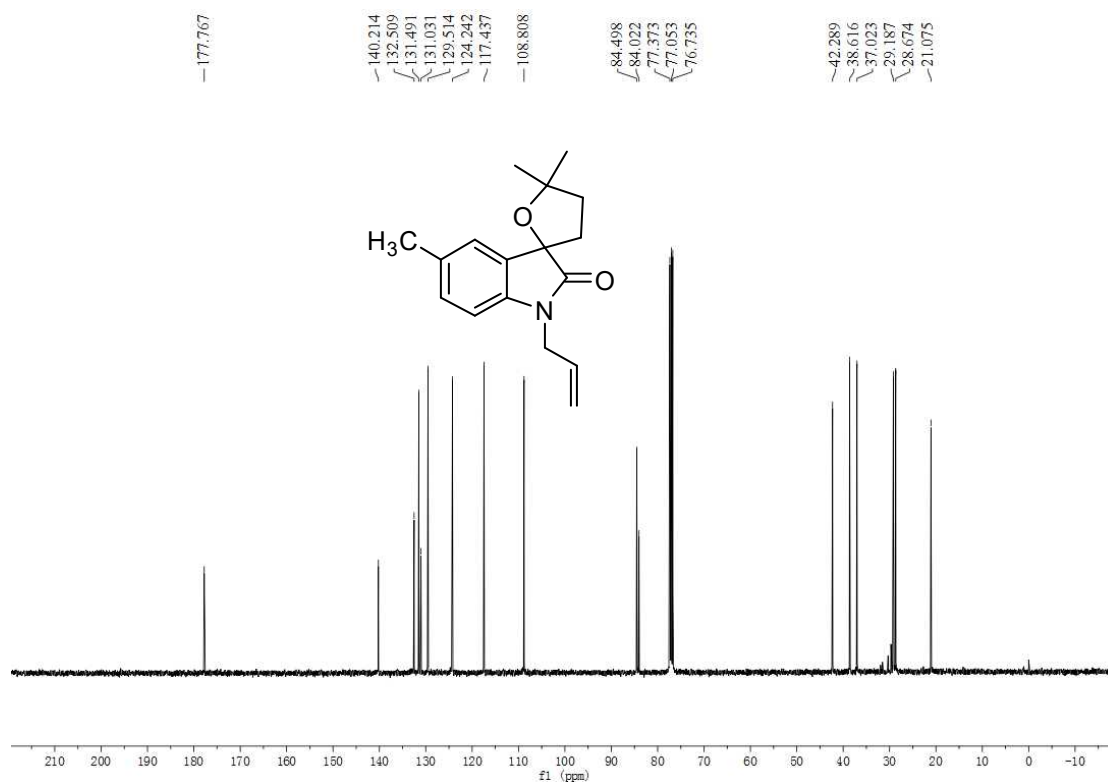

Figure S42. <sup>13</sup>C NMR Spectrum (100 MHz, CDCl<sub>3</sub>) of Compound 2u

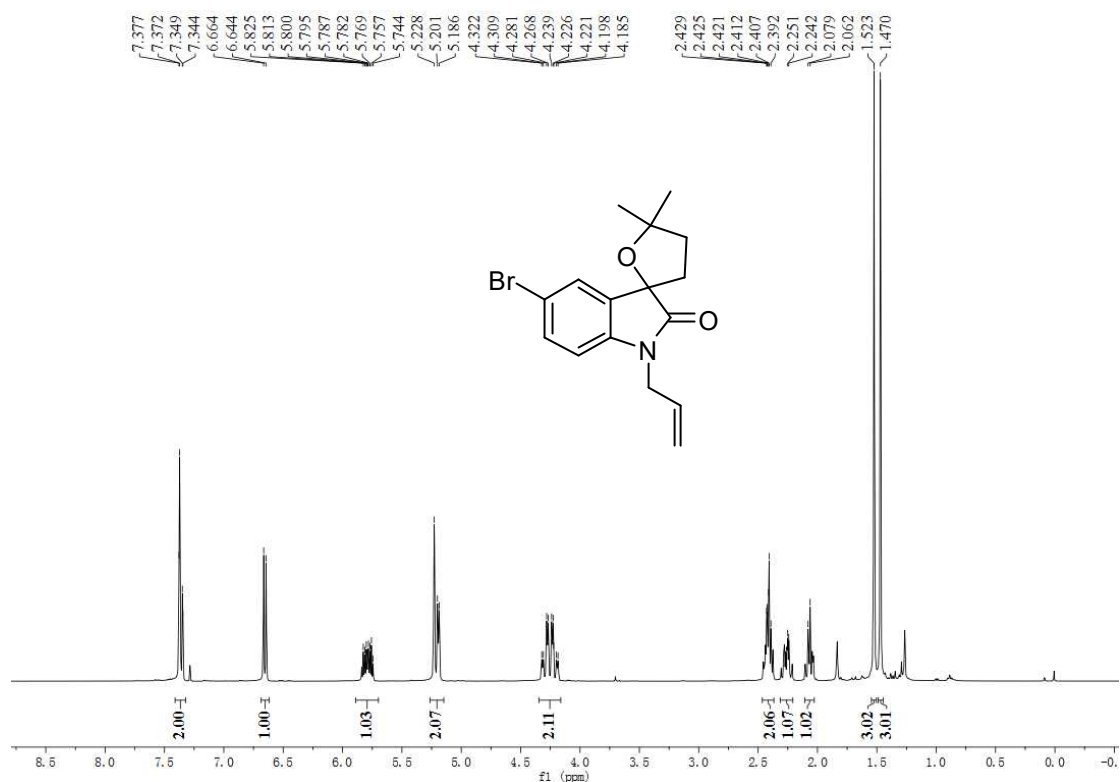

**Figure S43.** <sup>1</sup>H NMR Spectrum (400 MHz, CDCl<sub>3</sub>) of Compound 2v

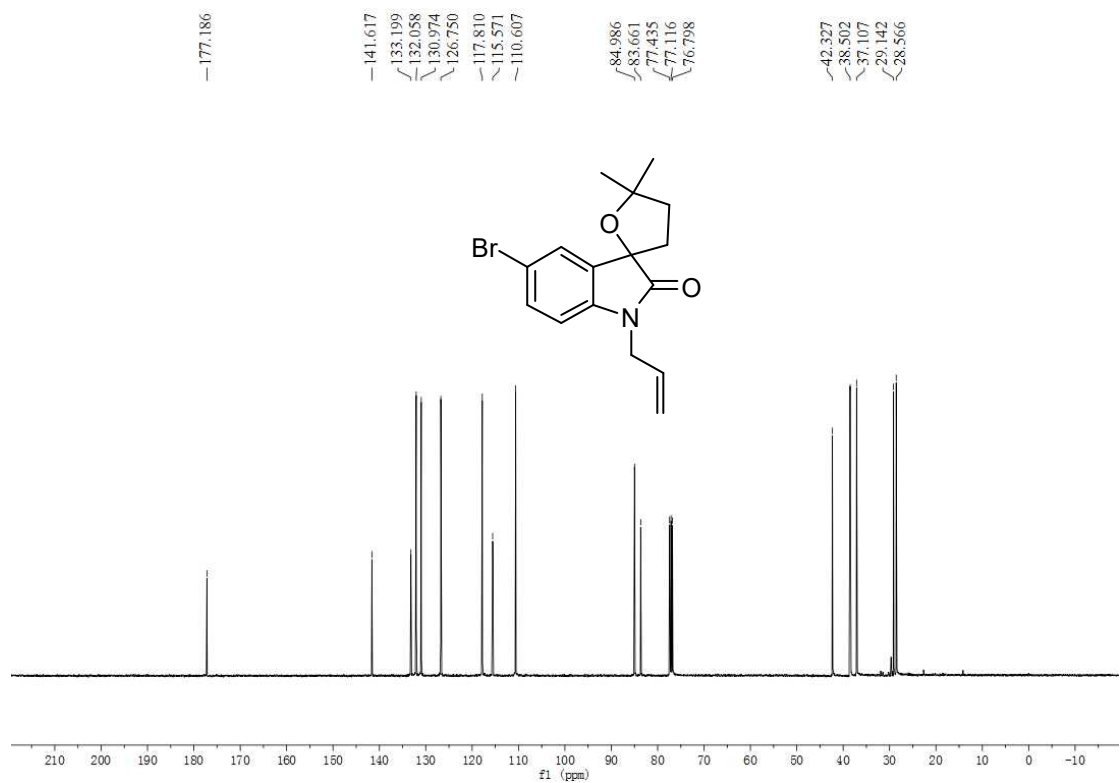

**Figure S44.** <sup>13</sup>C NMR Spectrum (100 MHz, CDCl<sub>3</sub>) of Compound 2v

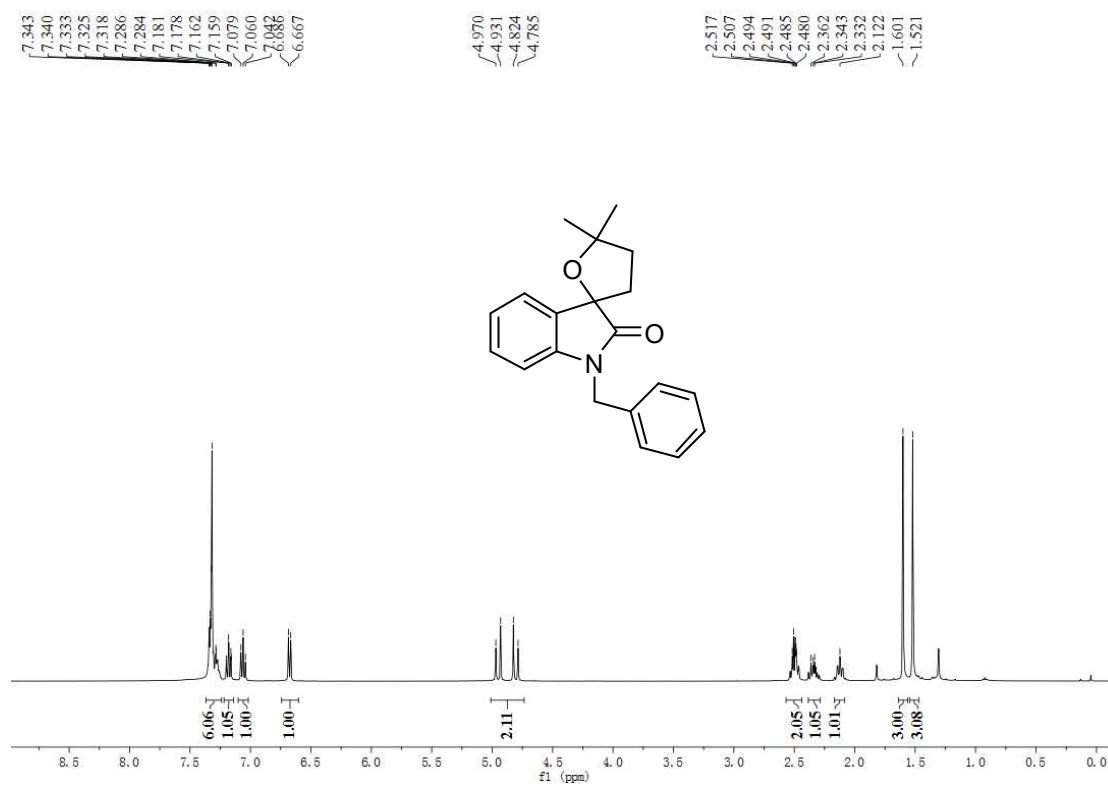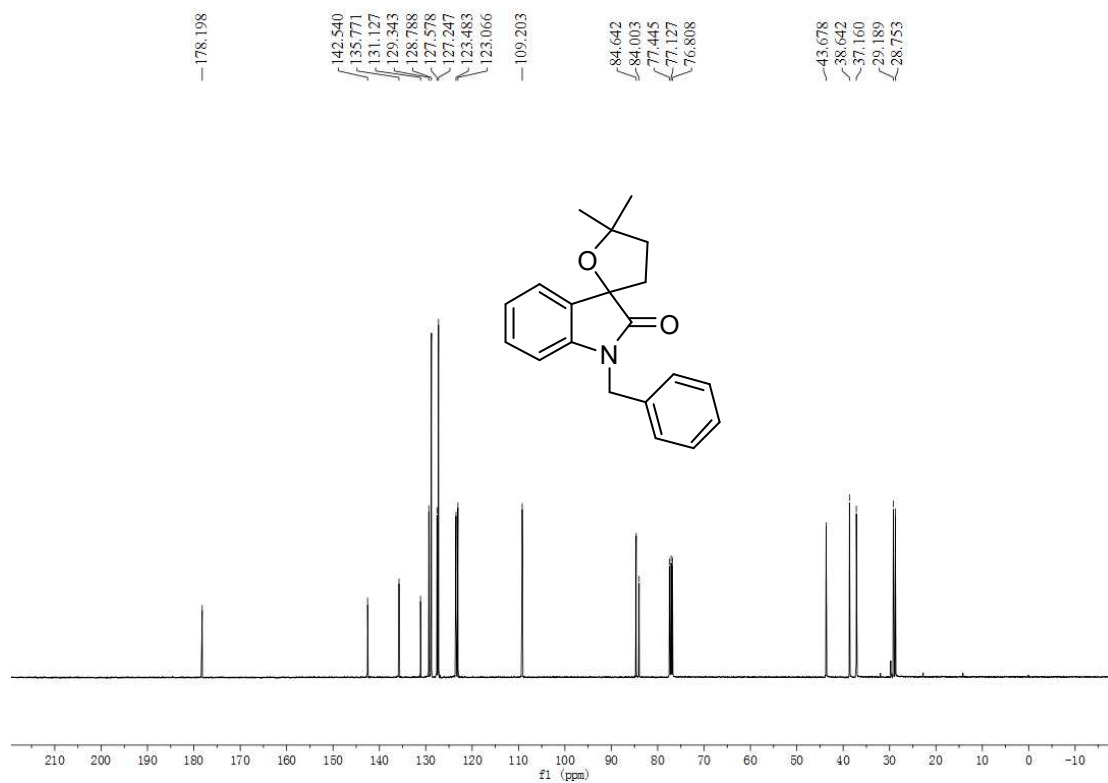

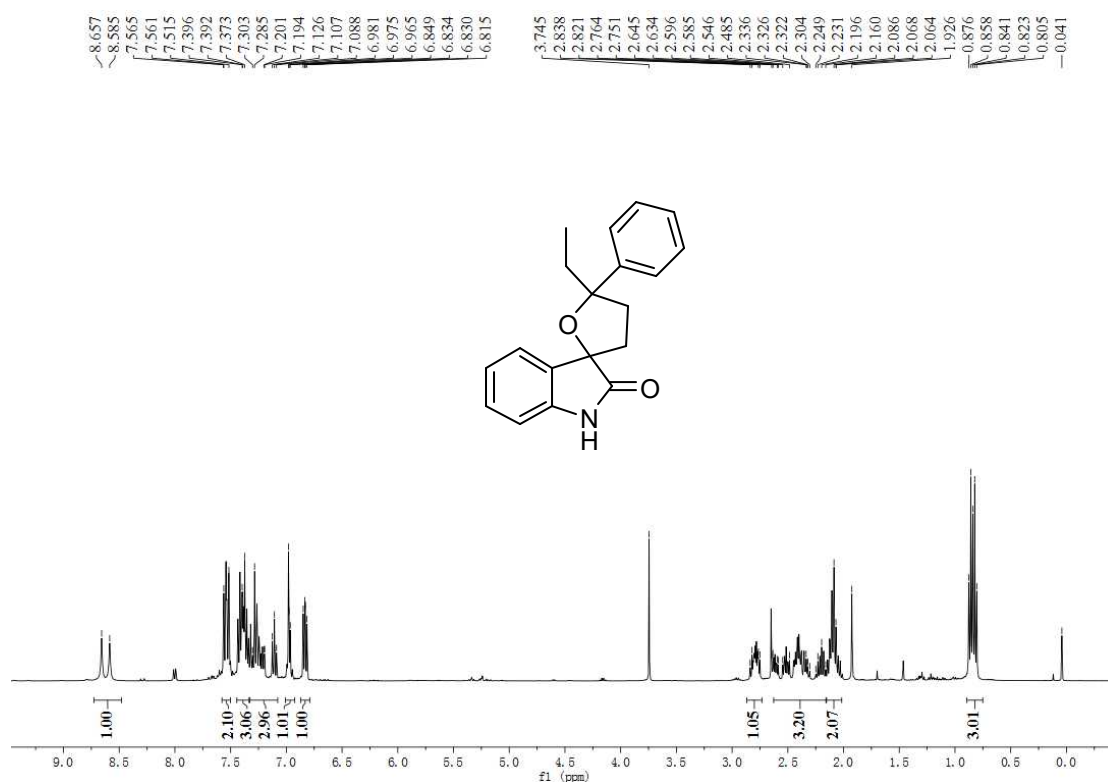

**Figure S47.** <sup>1</sup>H NMR Spectrum (400 MHz, CDCl<sub>3</sub>) of Compound **5**

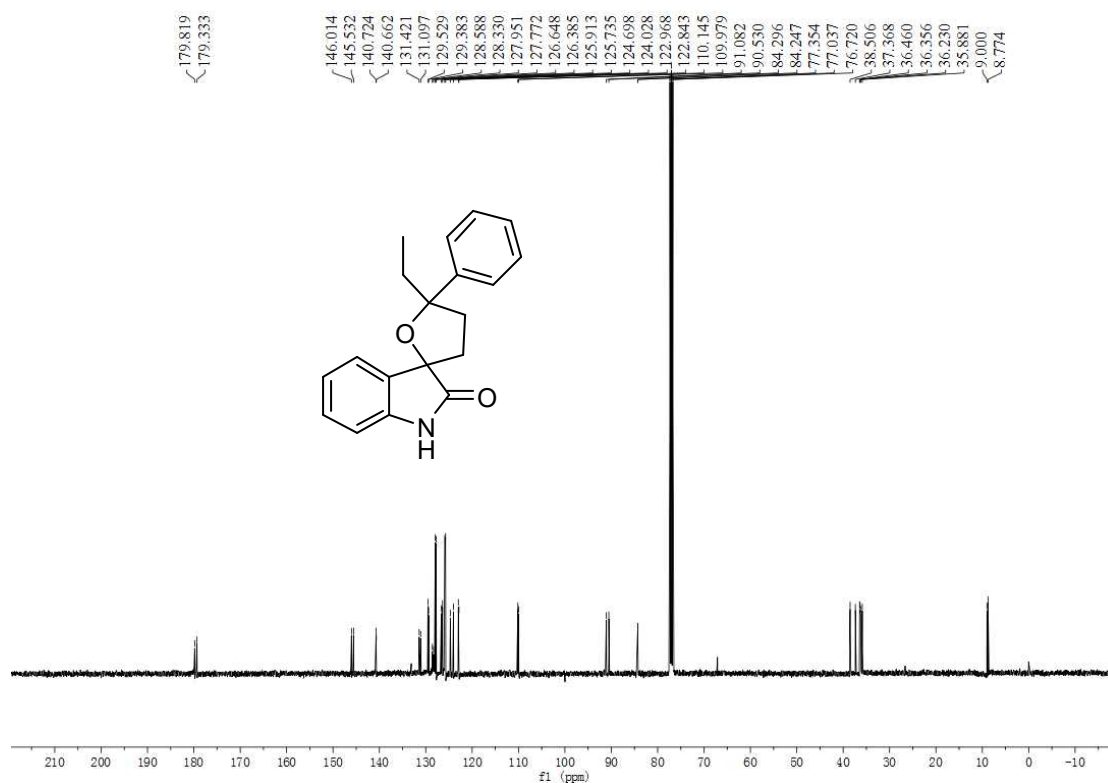

**Figure S48.** <sup>13</sup>C NMR Spectrum (100 MHz, CDCl<sub>3</sub>) of Compound **5**

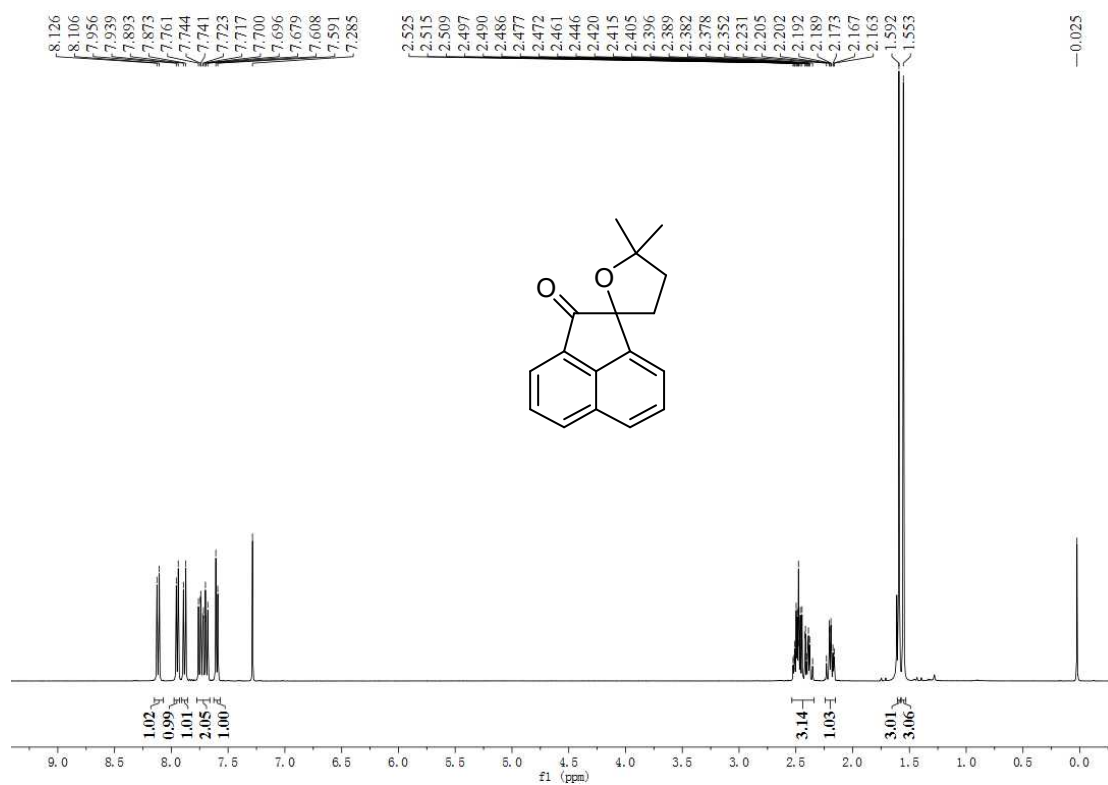

**Figure S49.** <sup>1</sup>H NMR Spectrum (400 MHz, CDCl<sub>3</sub>) of Compound 7

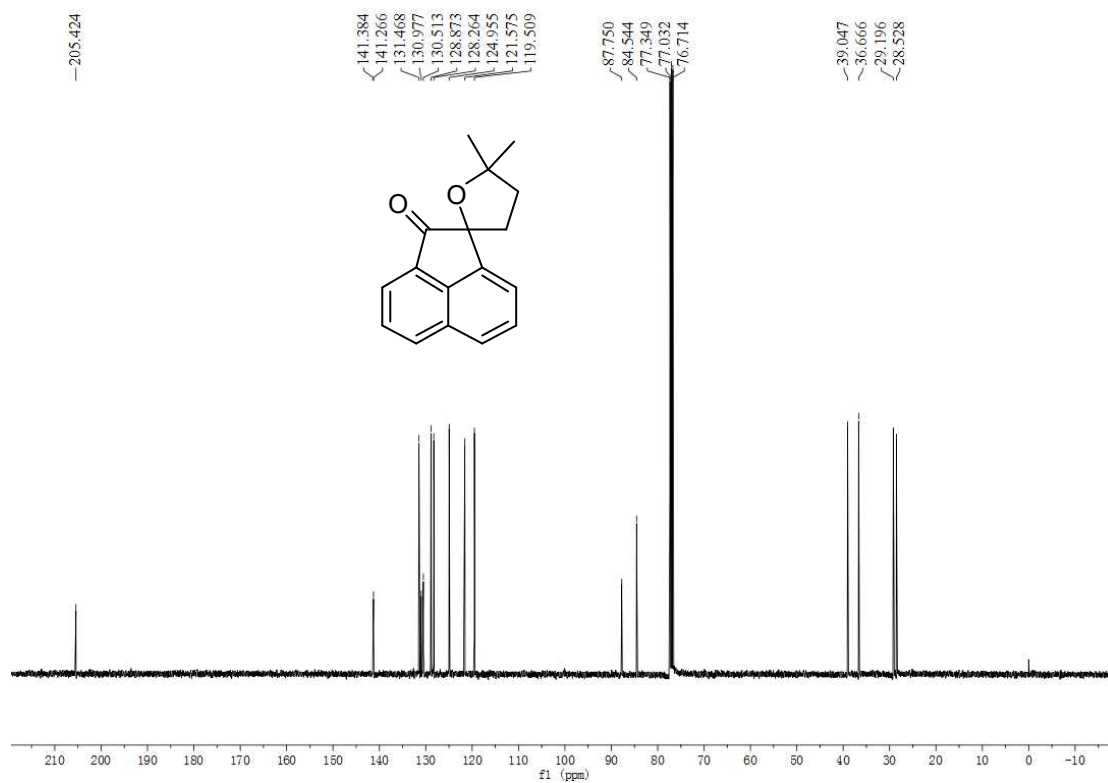

**Figure S50.** <sup>13</sup>C NMR Spectrum (100 MHz, CDCl<sub>3</sub>) of Compound 7

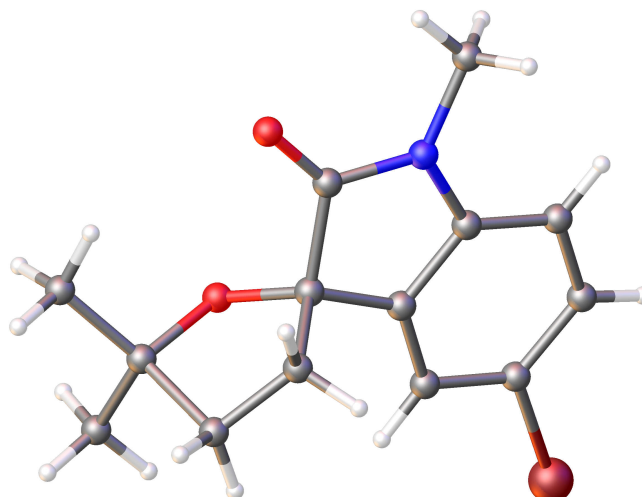

**Figure S51.** Crystal Structure of Compound **2o**

(Color scheme: C, gray; H, white; N, blue; O, red; Br, dark red)

**Table S1.** Crystal Data for Compound **2o**

| Formula                                             | C <sub>14</sub> H <sub>16</sub> BrNO <sub>2</sub>                                                                                                                                    |
|-----------------------------------------------------|--------------------------------------------------------------------------------------------------------------------------------------------------------------------------------------|
| Formula weight                                      | 205.45                                                                                                                                                                               |
| Temperature                                         | 293(2) K                                                                                                                                                                             |
| Wavelength                                          | 0.71073 Å                                                                                                                                                                            |
| Crystal system                                      | Monoclinic                                                                                                                                                                           |
| Space group                                         | <i>P</i> 2(1)/ <i>c</i>                                                                                                                                                              |
| Unit cell dimensions                                | $a = 9.2162(18) \text{ Å}$ , $\alpha = 90 \text{ deg.}$<br>$b = 11.9031(18) \text{ Å}$ , $\beta = 95.002(15) \text{ deg.}$<br>$c = 12.665(2) \text{ Å}$ , $\gamma = 90 \text{ deg.}$ |
| Volume                                              | 1236.7(2) Å <sup>3</sup>                                                                                                                                                             |
| <i>Z</i>                                            | 6                                                                                                                                                                                    |
| Density (calculated)                                | 1.479 Mg / m <sup>3</sup>                                                                                                                                                            |
| Absorption coefficient                              | 2.963 mm <sup>-1</sup>                                                                                                                                                               |
| <i>F</i> (000)                                      | 624                                                                                                                                                                                  |
| Theta range for data collection                     | 2.802 ° to 29.172°                                                                                                                                                                   |
| Limiting indices                                    | -11 ≤ <i>h</i> ≤ 6, -14 ≤ <i>k</i> ≤ 15, -16 ≤ <i>l</i> ≤ 17                                                                                                                         |
| Reflections collected                               | 6157                                                                                                                                                                                 |
| Independent reflections                             | 3147 [ <i>R</i> (int) = 0.0452]                                                                                                                                                      |
| Data / restraints / parameters                      | 3147 / 8 / 166                                                                                                                                                                       |
| Goodness-of-fit on <i>F</i> <sup>2</sup>            | 1.034                                                                                                                                                                                |
| Final <i>R</i> indices [ <i>I</i> > 2σ( <i>I</i> )] | <i>R</i> <sub>1</sub> = 0.0914, <i>wR</i> <sub>2</sub> = 0.2174                                                                                                                      |
| <i>R</i> indices (all data)                         | <i>R</i> <sub>1</sub> = 0.1689, <i>wR</i> <sub>2</sub> = 0.2791                                                                                                                      |
| Largest diff. peak and hole                         | 1.739 and -1.082 e. Å <sup>-3</sup>                                                                                                                                                  |
